# Supplementary material
Source: PubMed Central journal article supplement (PMC2956604)
Supplement: NIHMS237025-supplement-1_si_001.pdf [file NIHMS237025-supplement-1_si_001.pdf]

## Supporting Information

### Potent, Highly Selective, and Orally Bioavailable *Gem*-Difluorinated Monocationic Inhibitors of Neuronal Nitric Oxide Synthase

Fengtian Xue,<sup>1,5</sup> Huiying Li,<sup>2</sup> Silvia L. Delker,<sup>2</sup> Jianguo Fang,<sup>1</sup> Pavel Martíásek,<sup>3,4</sup> Linda  
J. Roman,<sup>3</sup> Thomas L. Poulos,<sup>\*2</sup> and Richard B. Silverman<sup>\*,1</sup>

<sup>1</sup>*Department of Chemistry, Department of Biochemistry, Molecular Biology, and Cell  
Biology, Center for Molecular Innovation and Drug Discovery, Chemistry of Life  
Processes Institute, Northwestern University, 2145 Sheridan Road, Evanston, Illinois  
60208-3113*

<sup>2</sup>*Departments of Molecular Biology and Biochemistry, Pharmaceutical Chemistry, and  
Chemistry, University of California, Irvine, California 92697-3900*

<sup>3</sup>*Department of Biochemistry, University of Texas Health Science Center, San Antonio,  
Texas*

<sup>4</sup>*Department of Pediatrics and Center for Applied Genomics, 1<sup>st</sup> School of Medicine,  
Charles University, Prague, Czech Republic*

<sup>5</sup>*Present address: Department of Chemistry, University of Louisiana at Lafayette, P.O.  
Box 44370, Lafayette, Louisiana 70504, USA*

*\*Correspondence Authors: Richard B. Silverman, Department of Chemistry,  
Northwestern University, [Agman@chem.northwestern.edu](mailto:Agman@chem.northwestern.edu)*

*Thomas L. Poulos, Department of Molecular Biology and Biochemistry, University of  
California, Irvine, [poulos@uci.edu](mailto:poulos@uci.edu)*

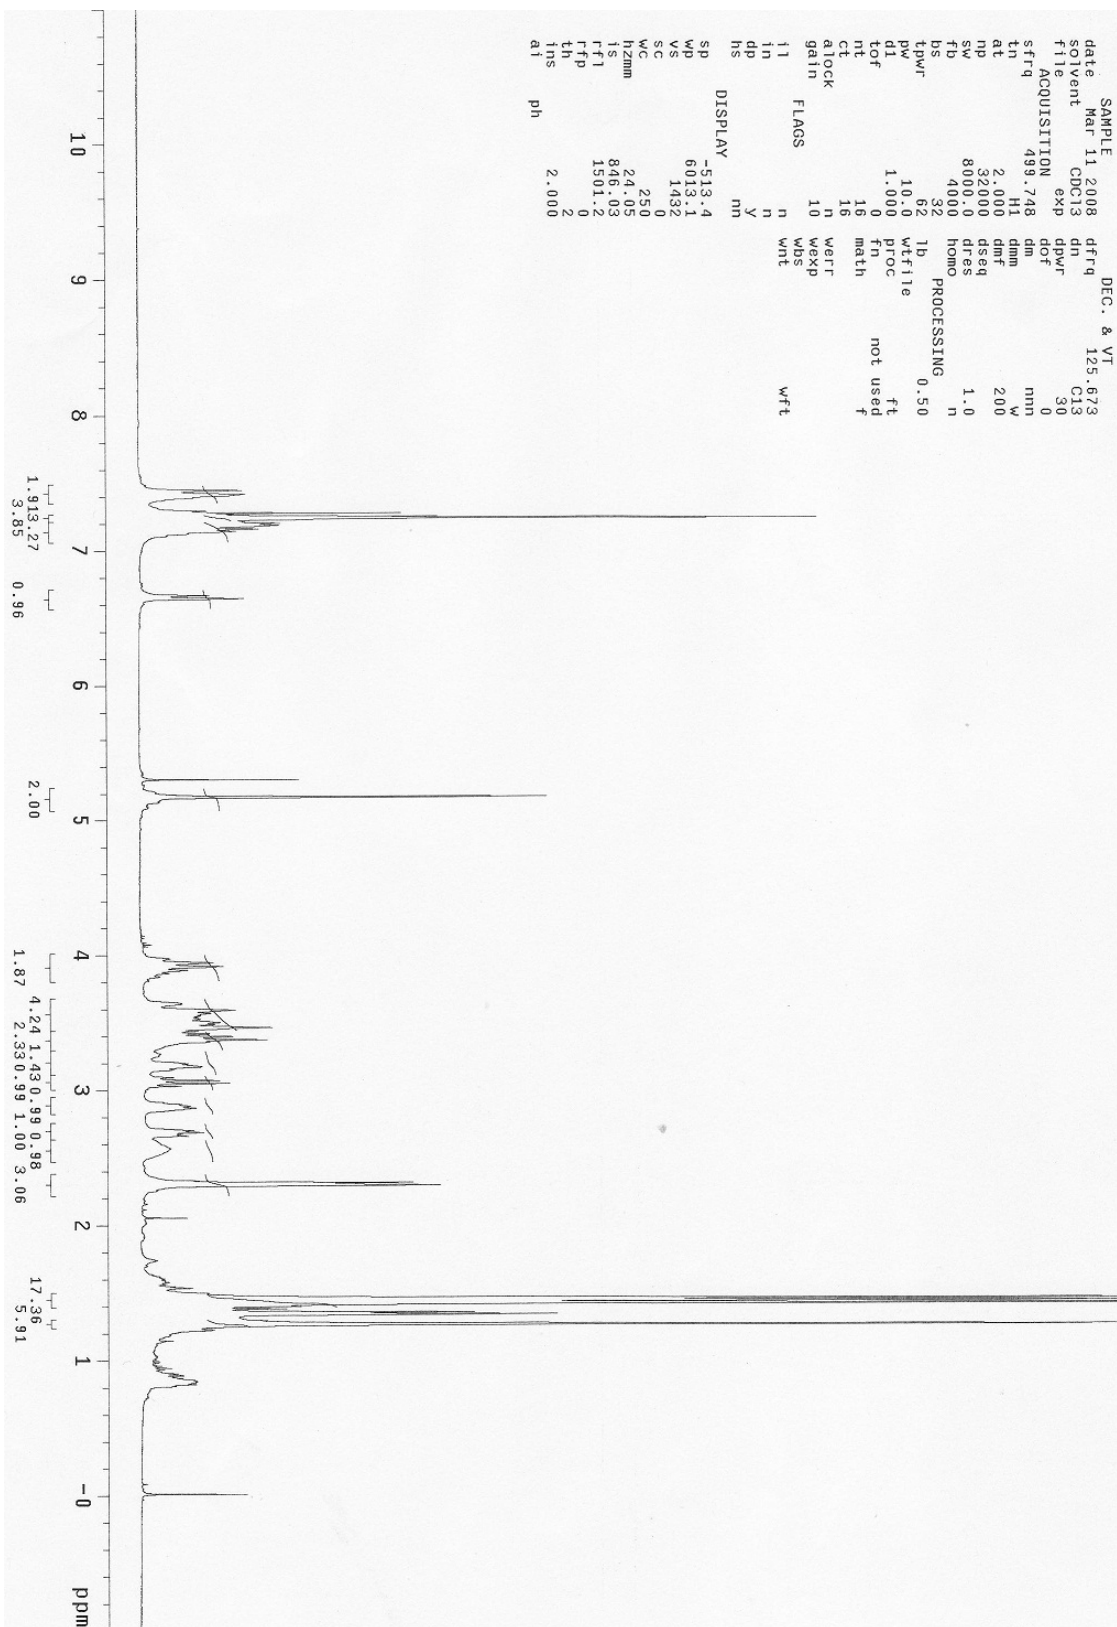

Figure S1. <sup>1</sup>H NMR spectrum of 9a or 9b.

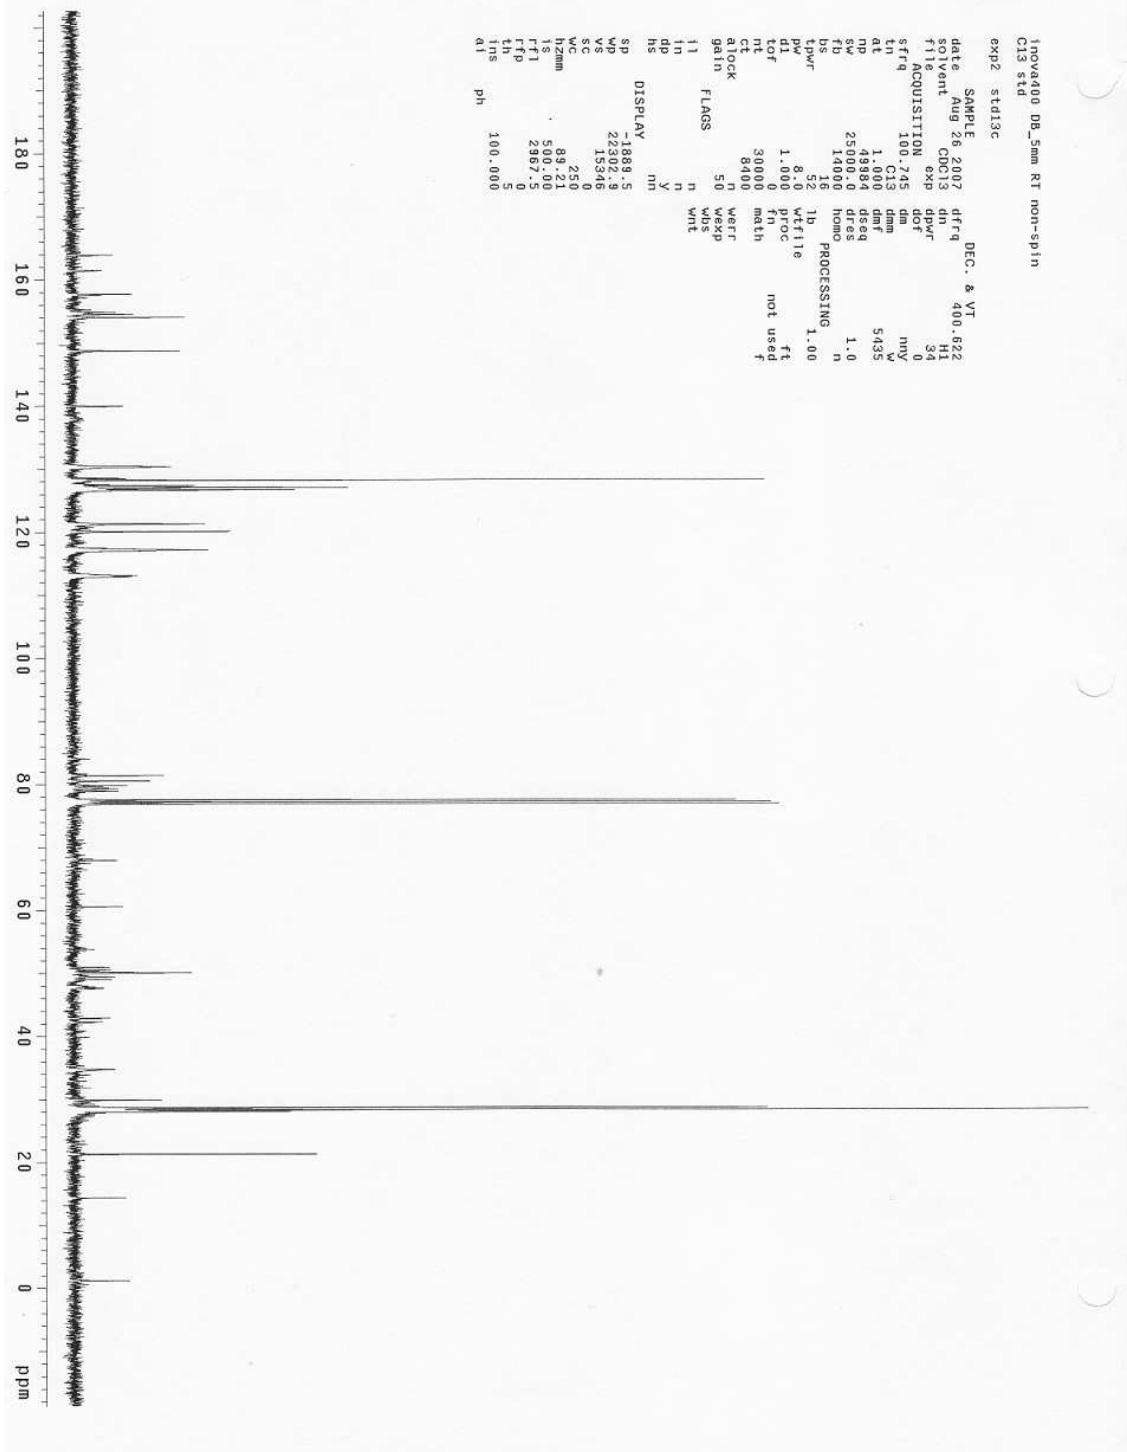

Figure S2.  $^{13}\text{C}$  NMR spectrum of **9a** or **9b**

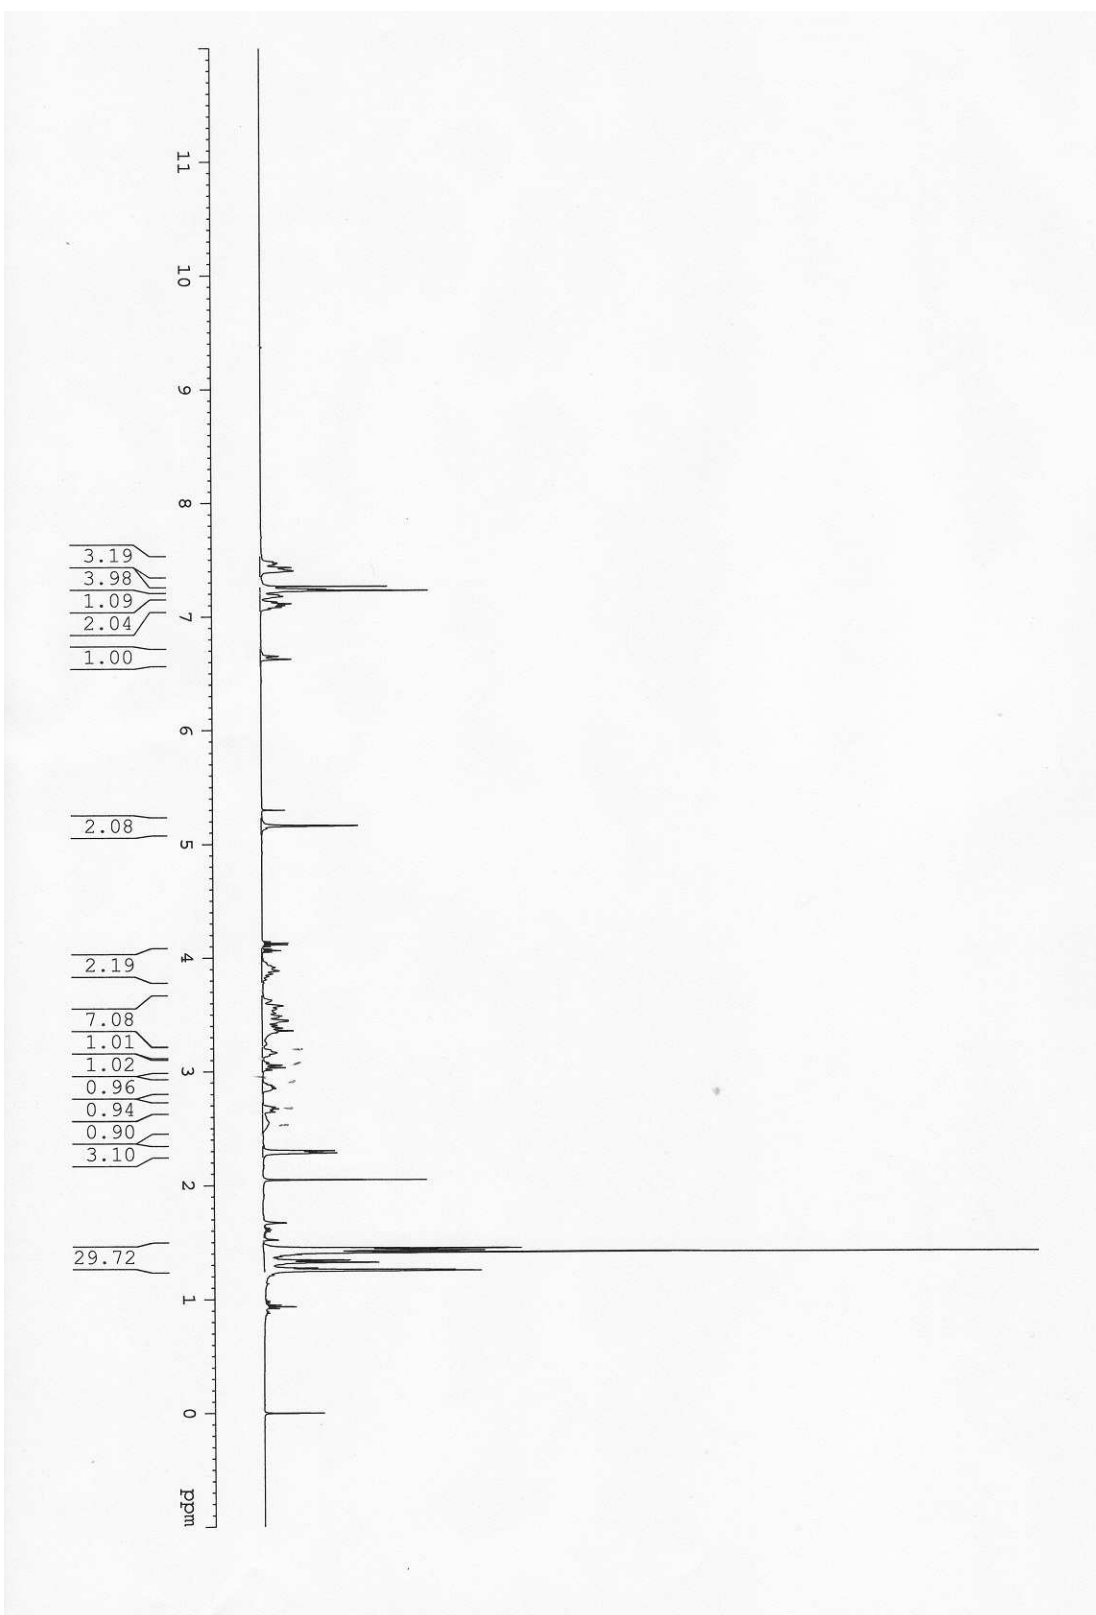

**Figure S3.** <sup>1</sup>H NMR spectrum of **9c**.

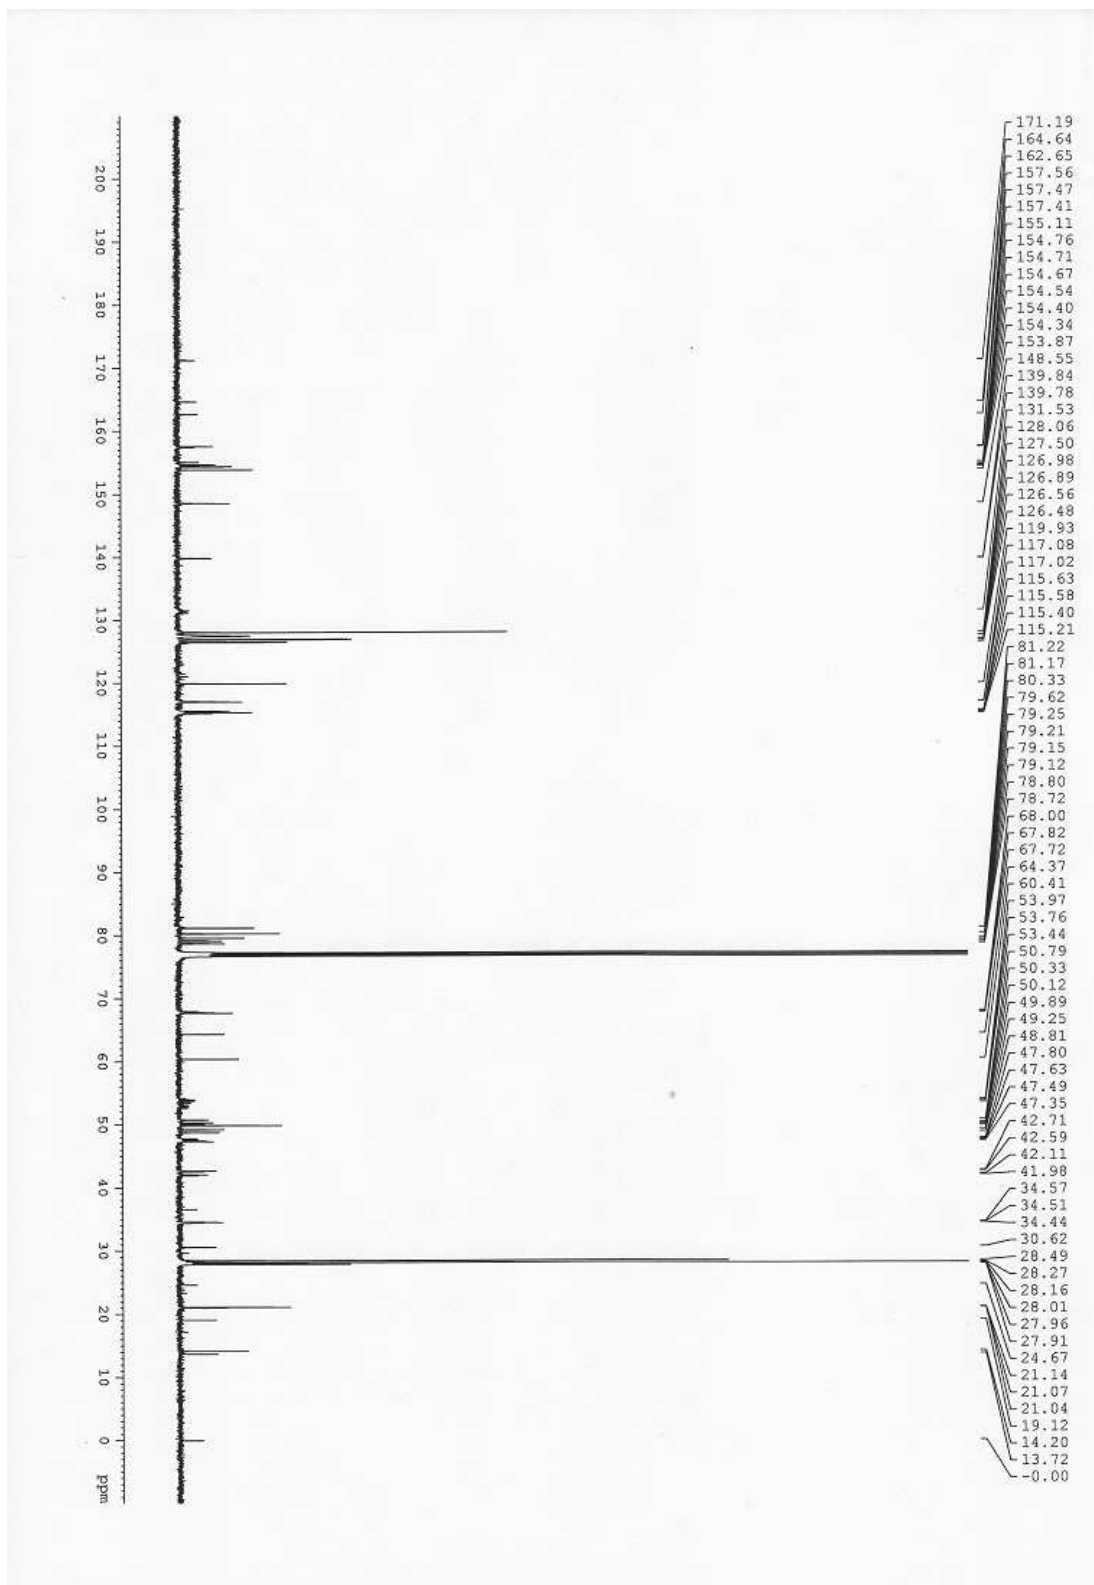

Figure S4.  $^{13}\text{C}$  NMR spectrum of **9c**.

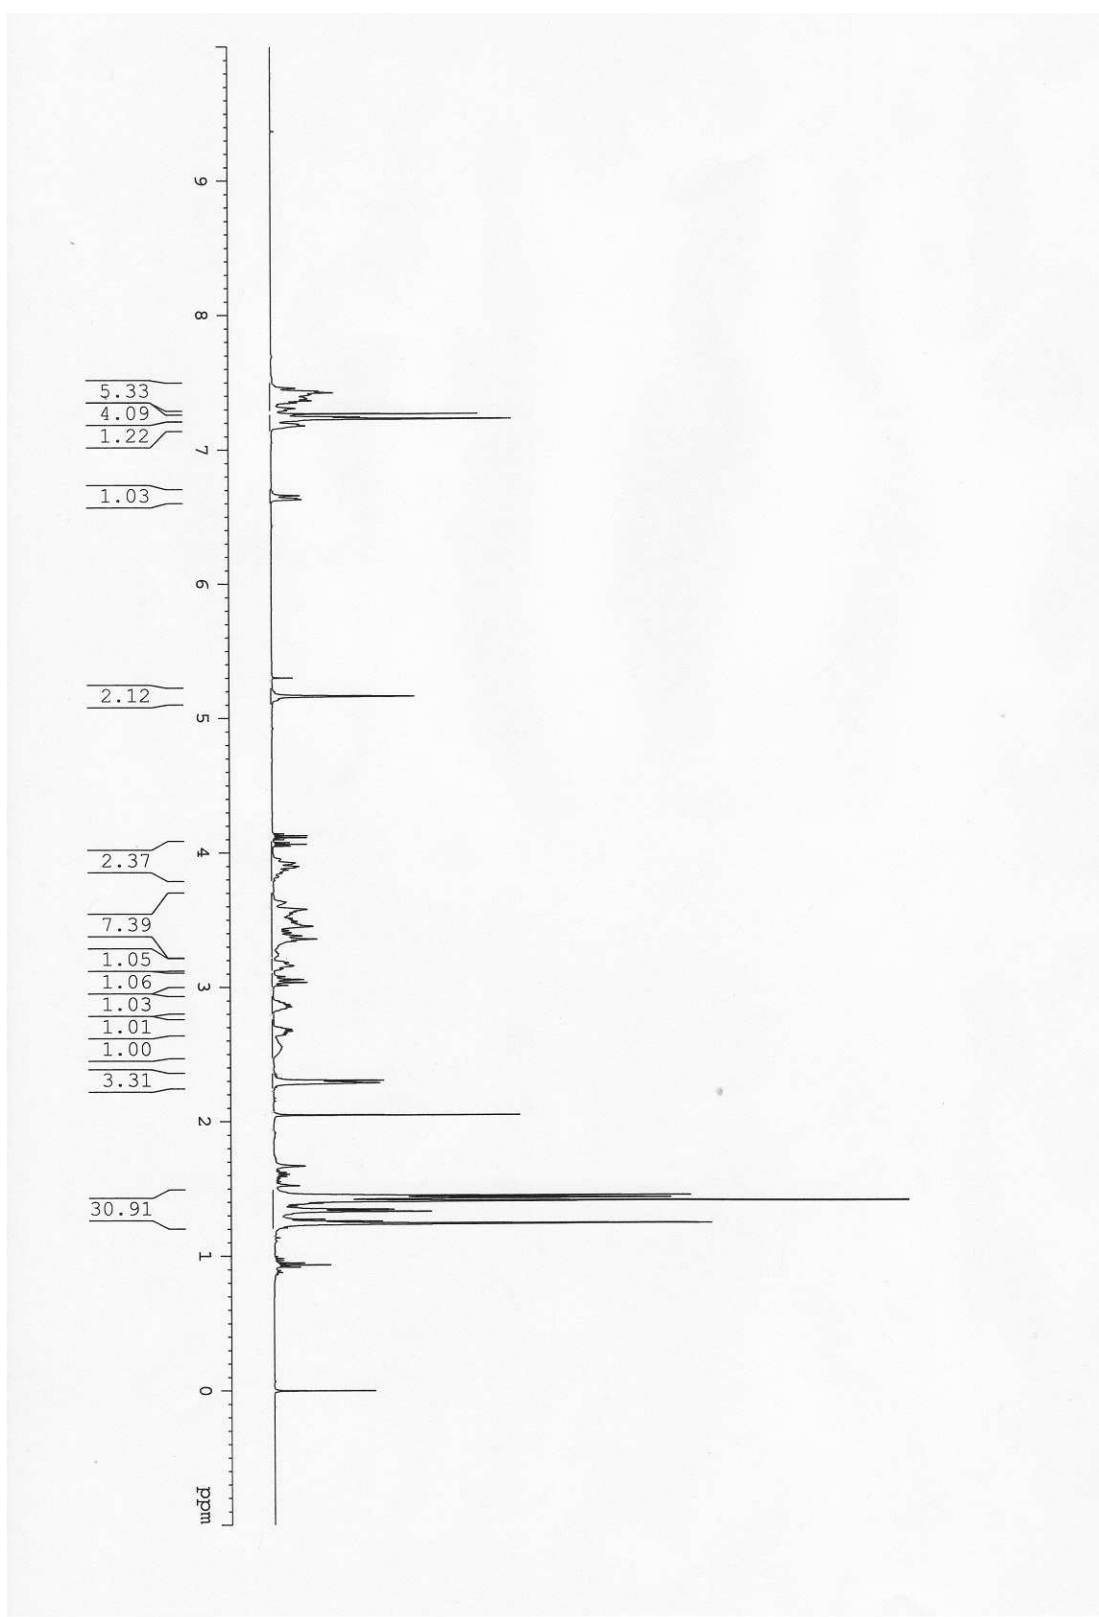

**Figure S5.**  $^1\text{H}$  NMR spectrum of **9d**.

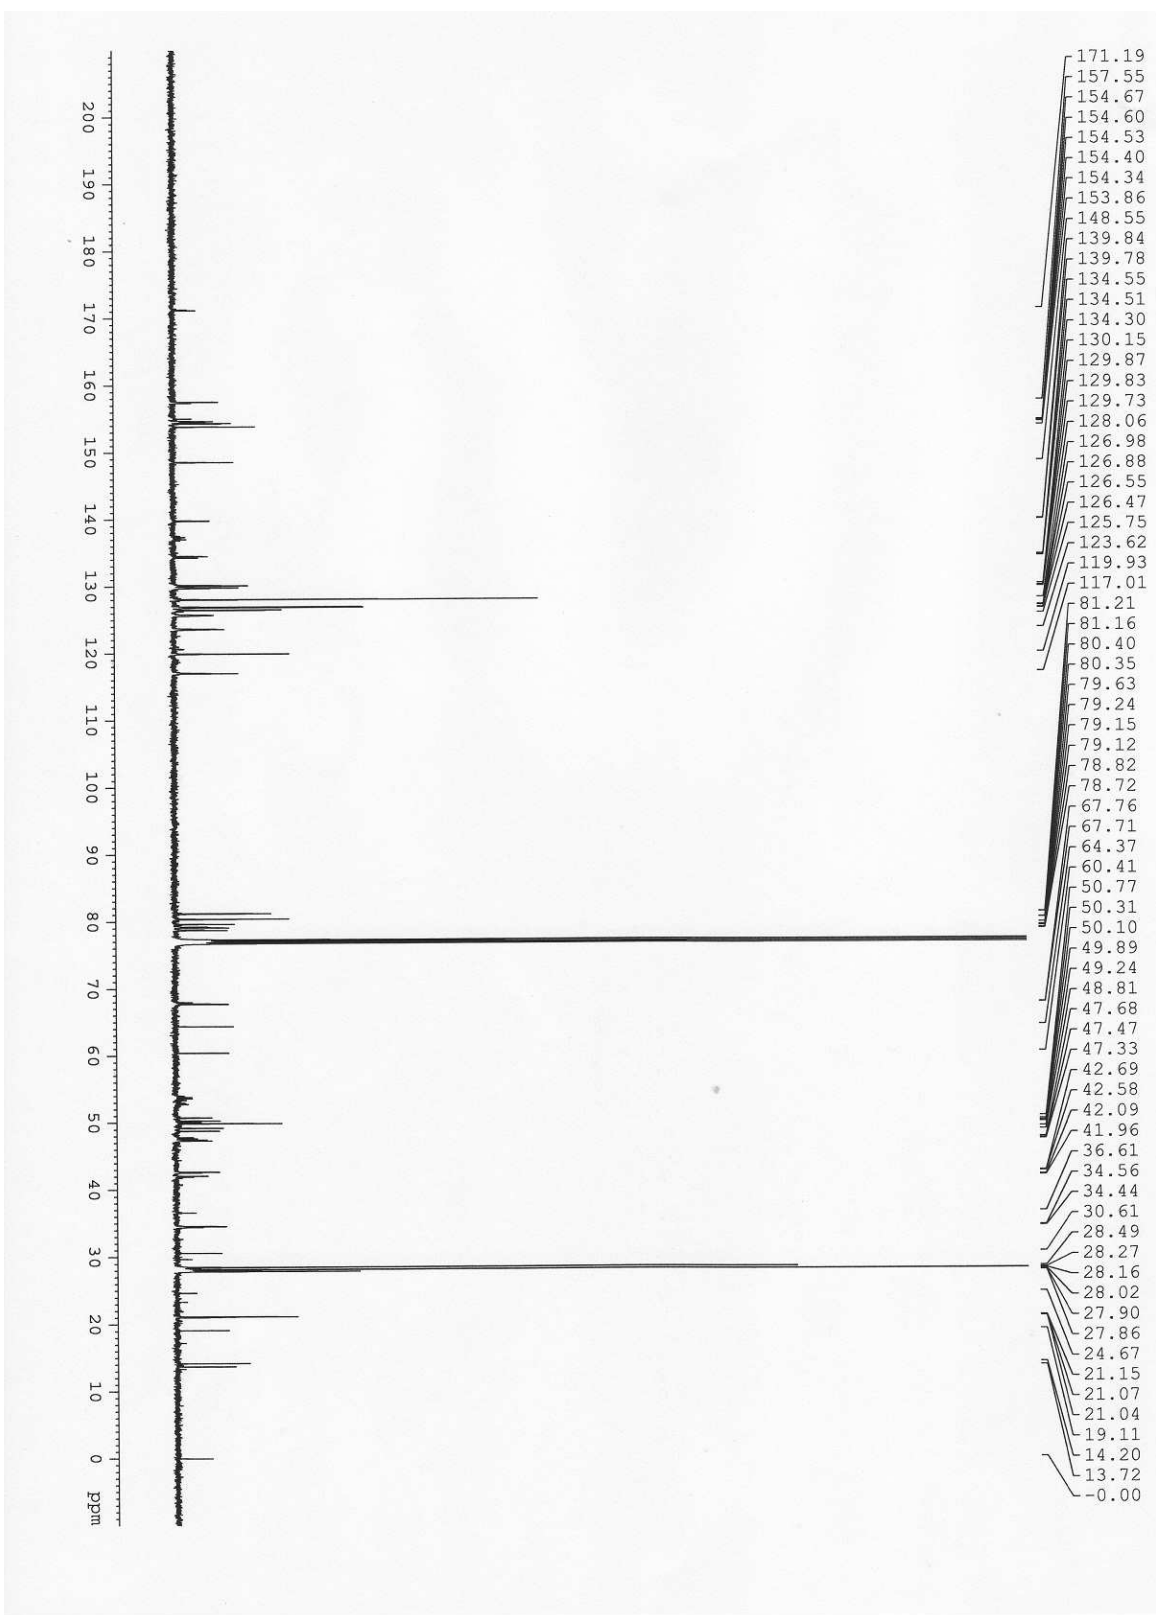

Figure S6.  $^{13}\text{C}$  NMR spectrum of **9d**.

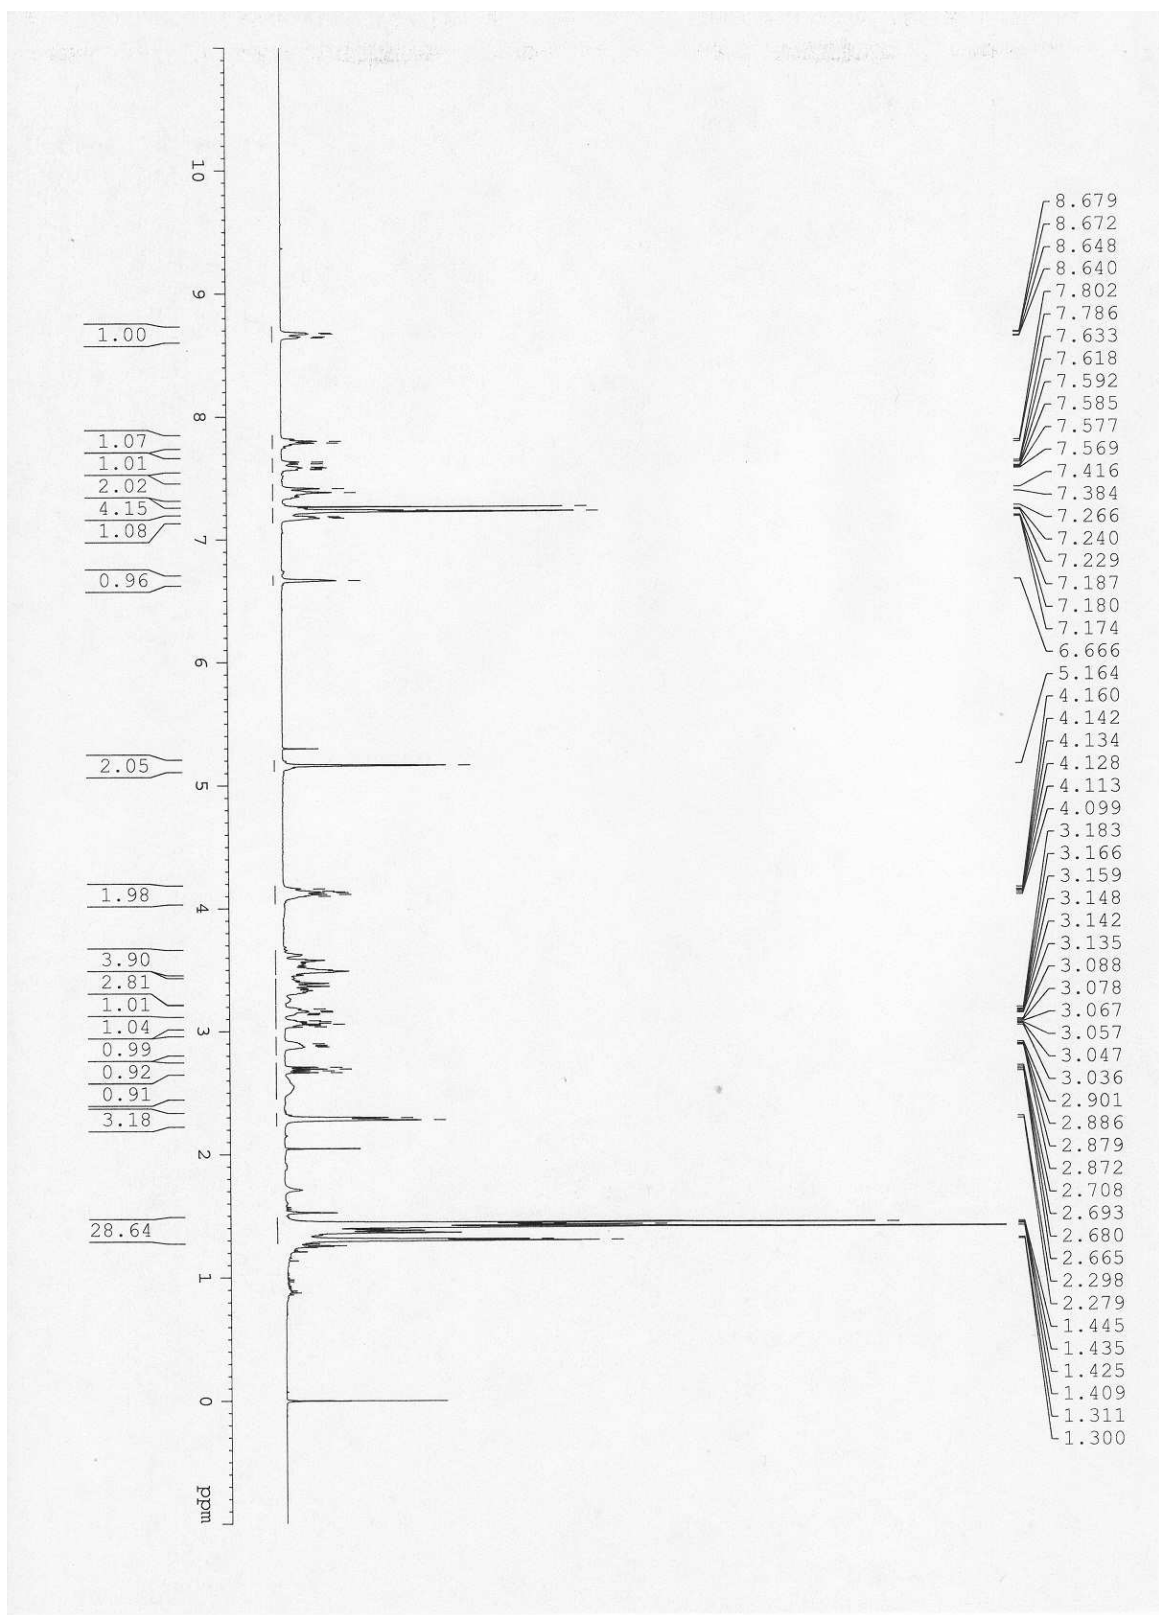

**Figure S7.**  $^1\text{H}$  NMR spectrum of **9f**.



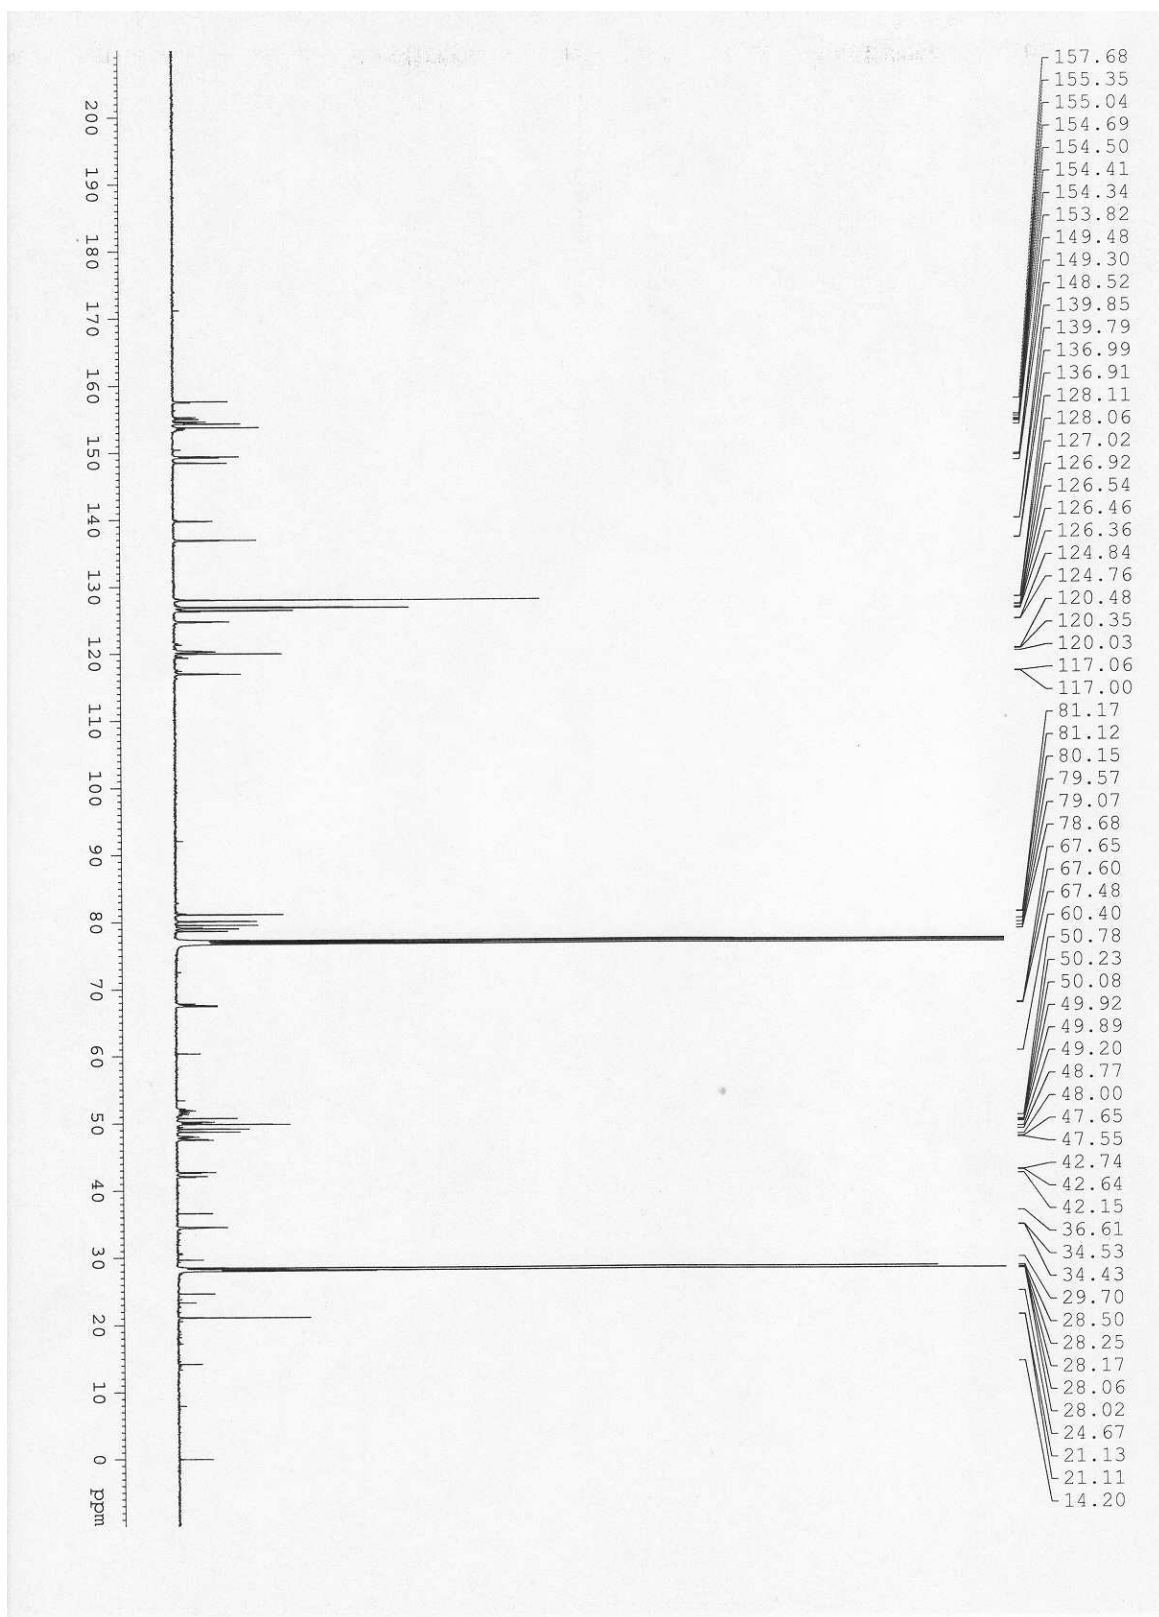

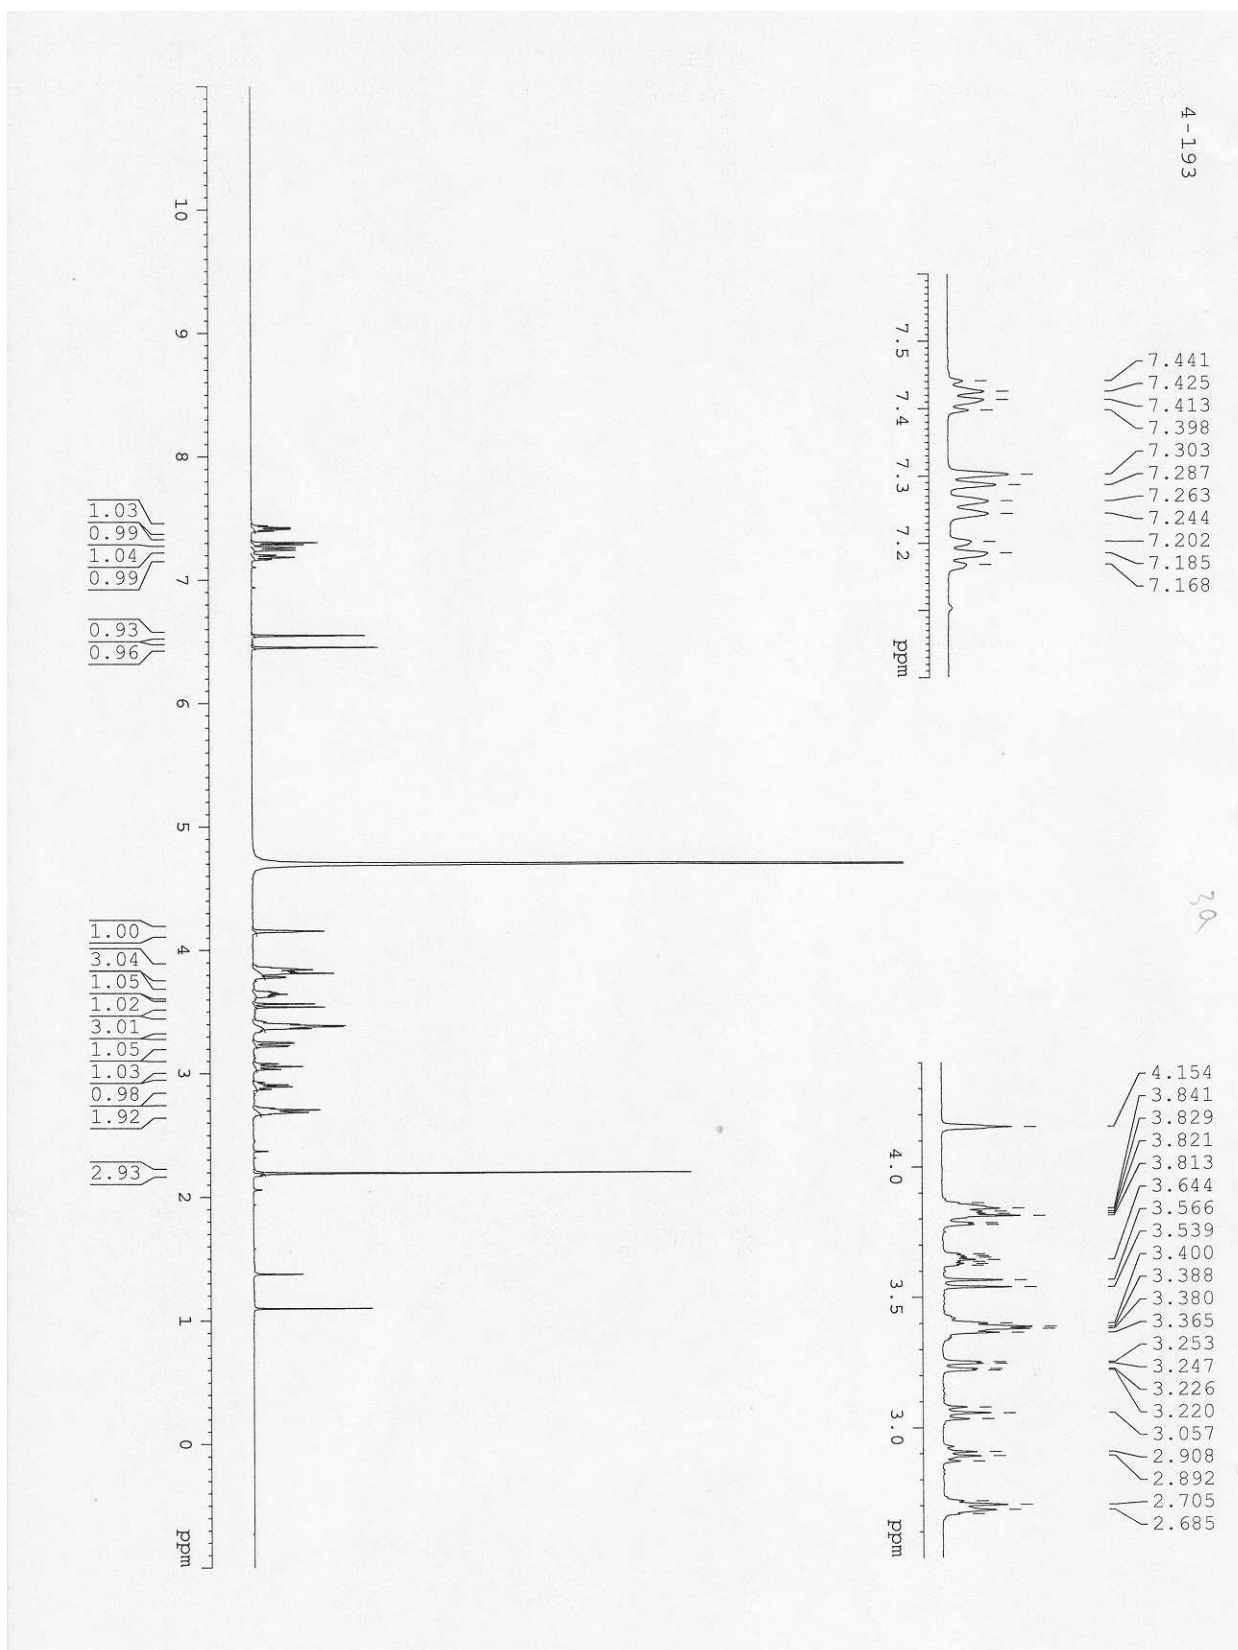

Figure S9.  $^1\text{H}$  NMR spectrum of **3a**.

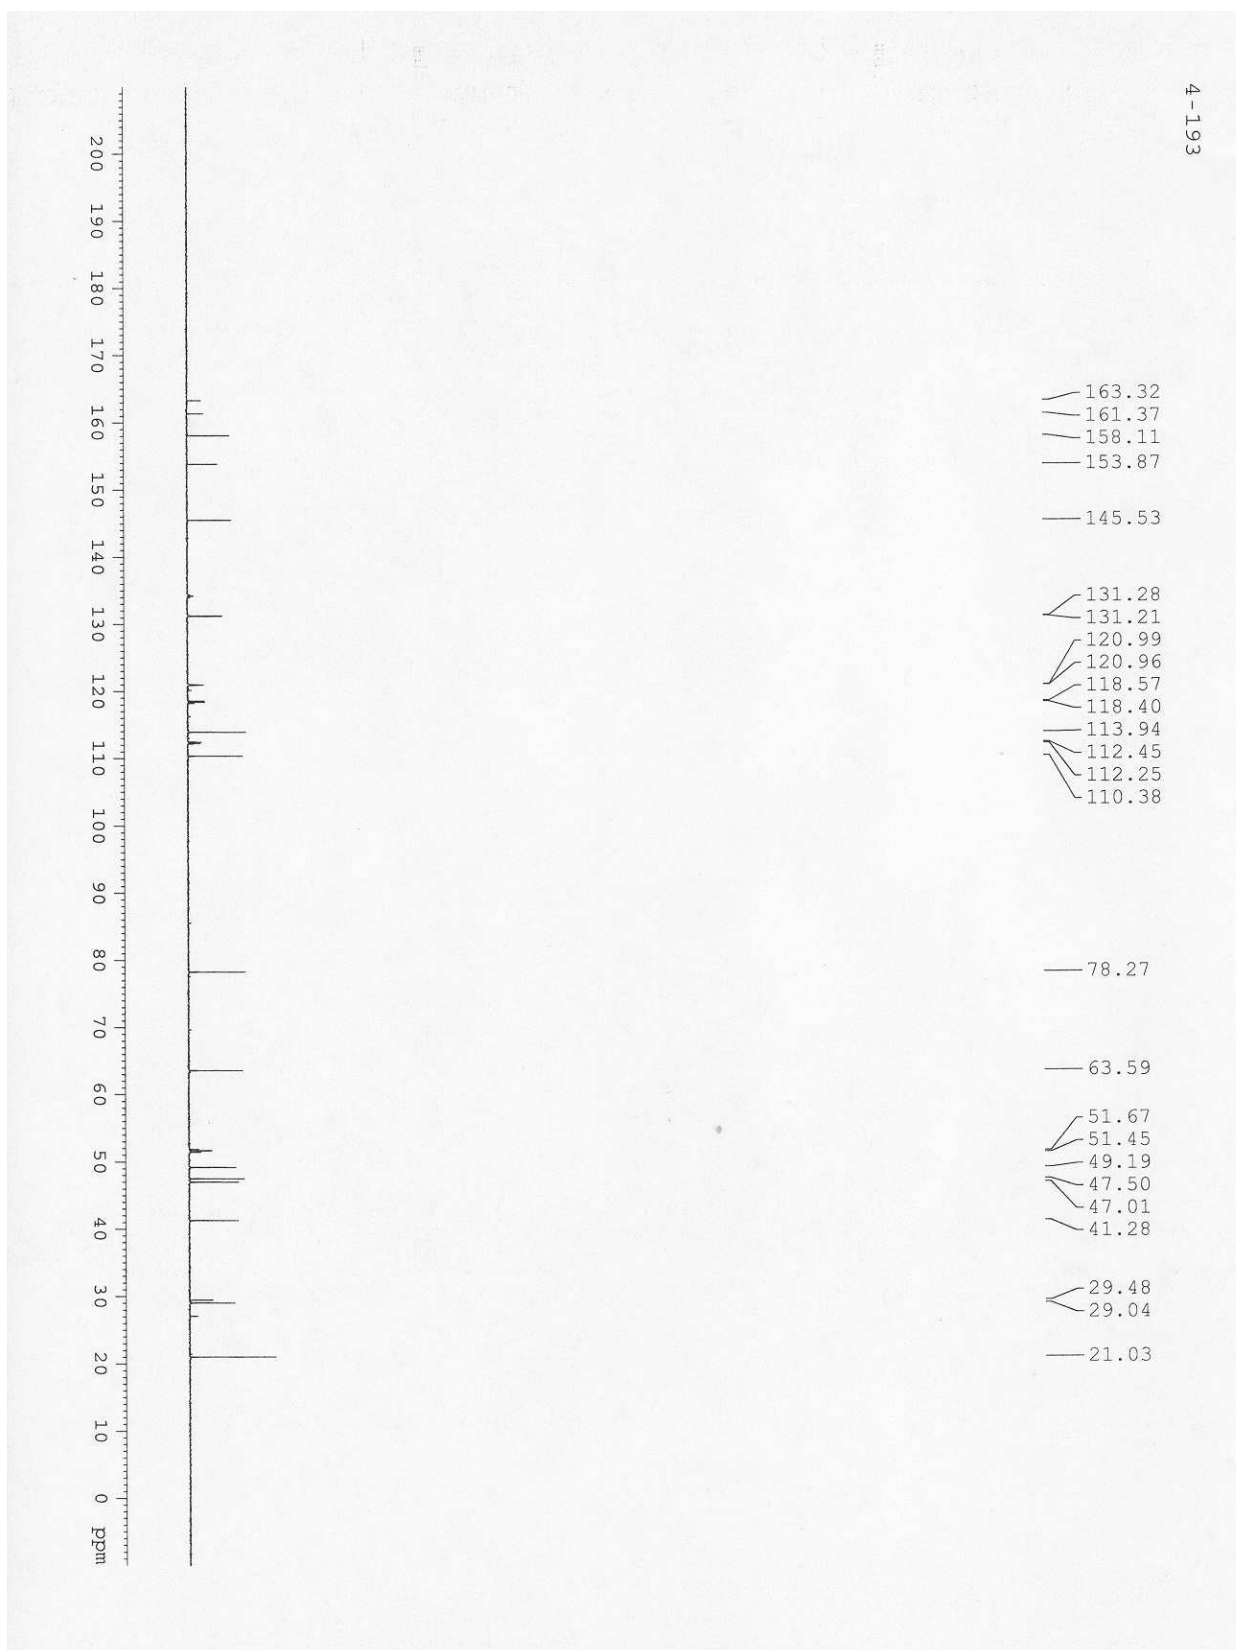

Figure S10.  $^{13}\text{C}$  NMR spectrum of 3a.

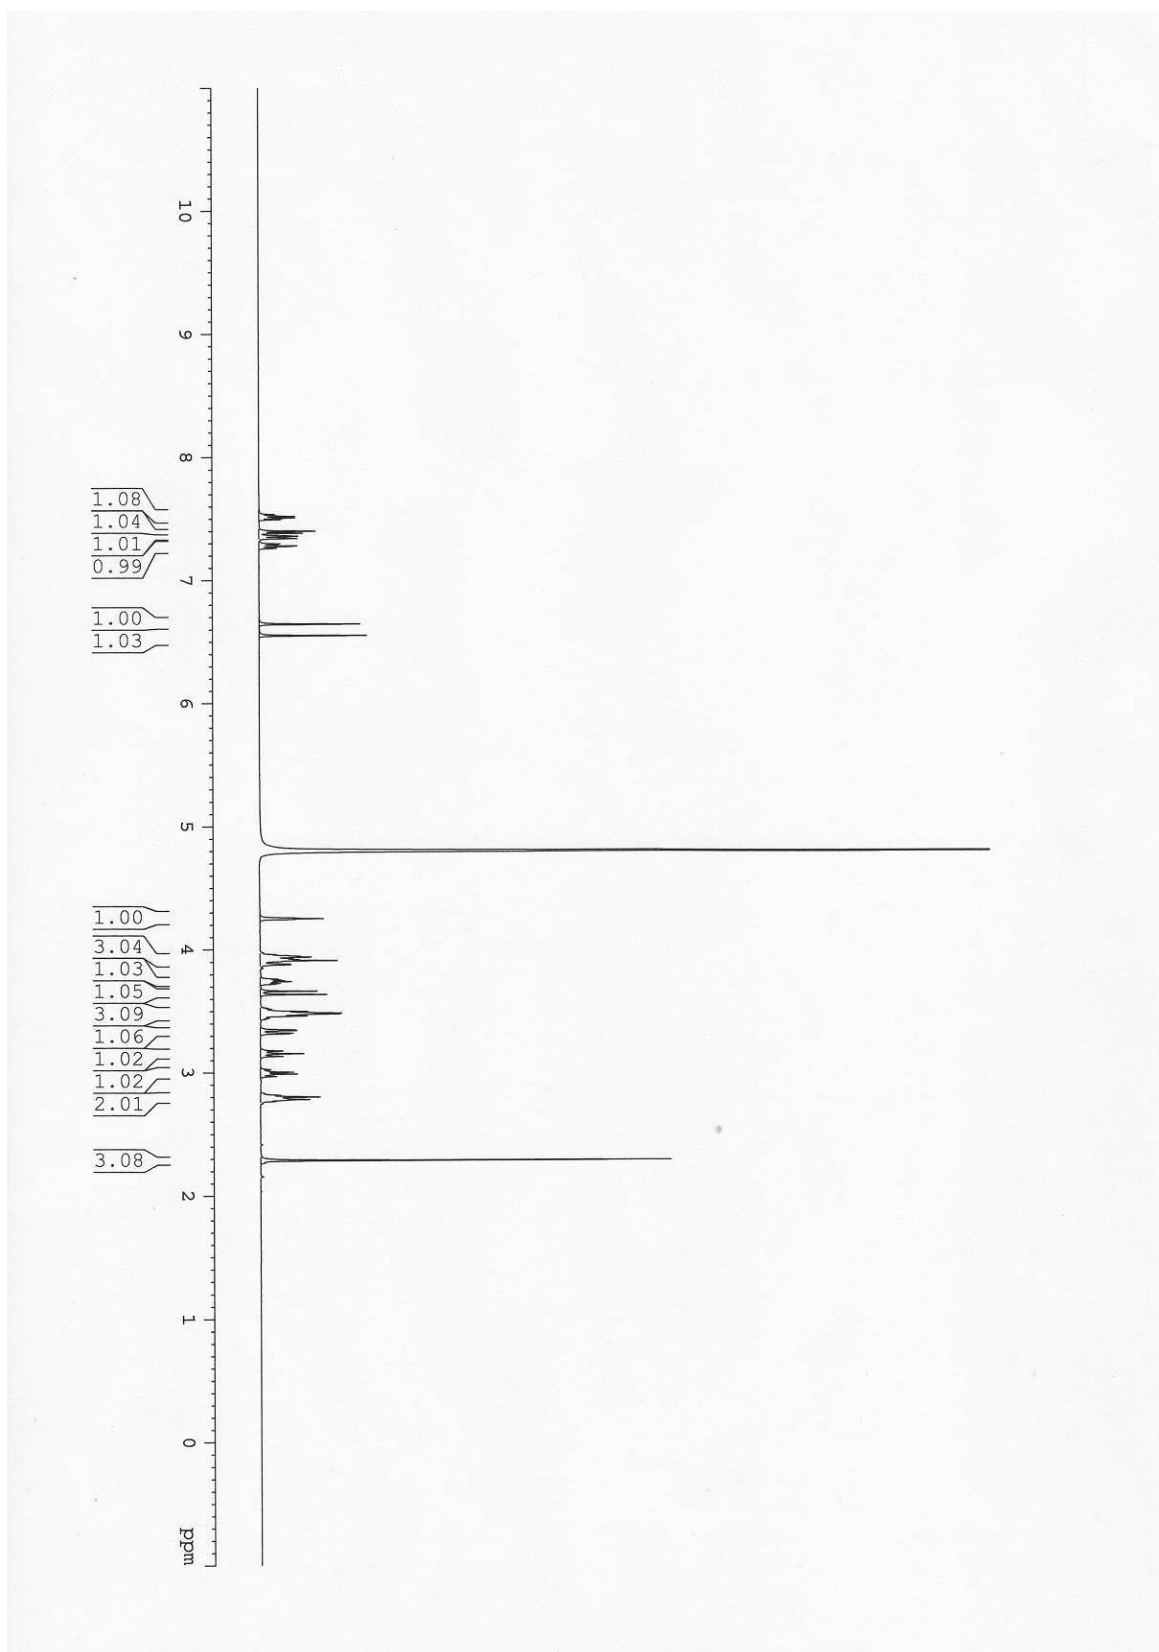

**Figure S11.**  $^1\text{H}$  NMR spectrum of **3b**.

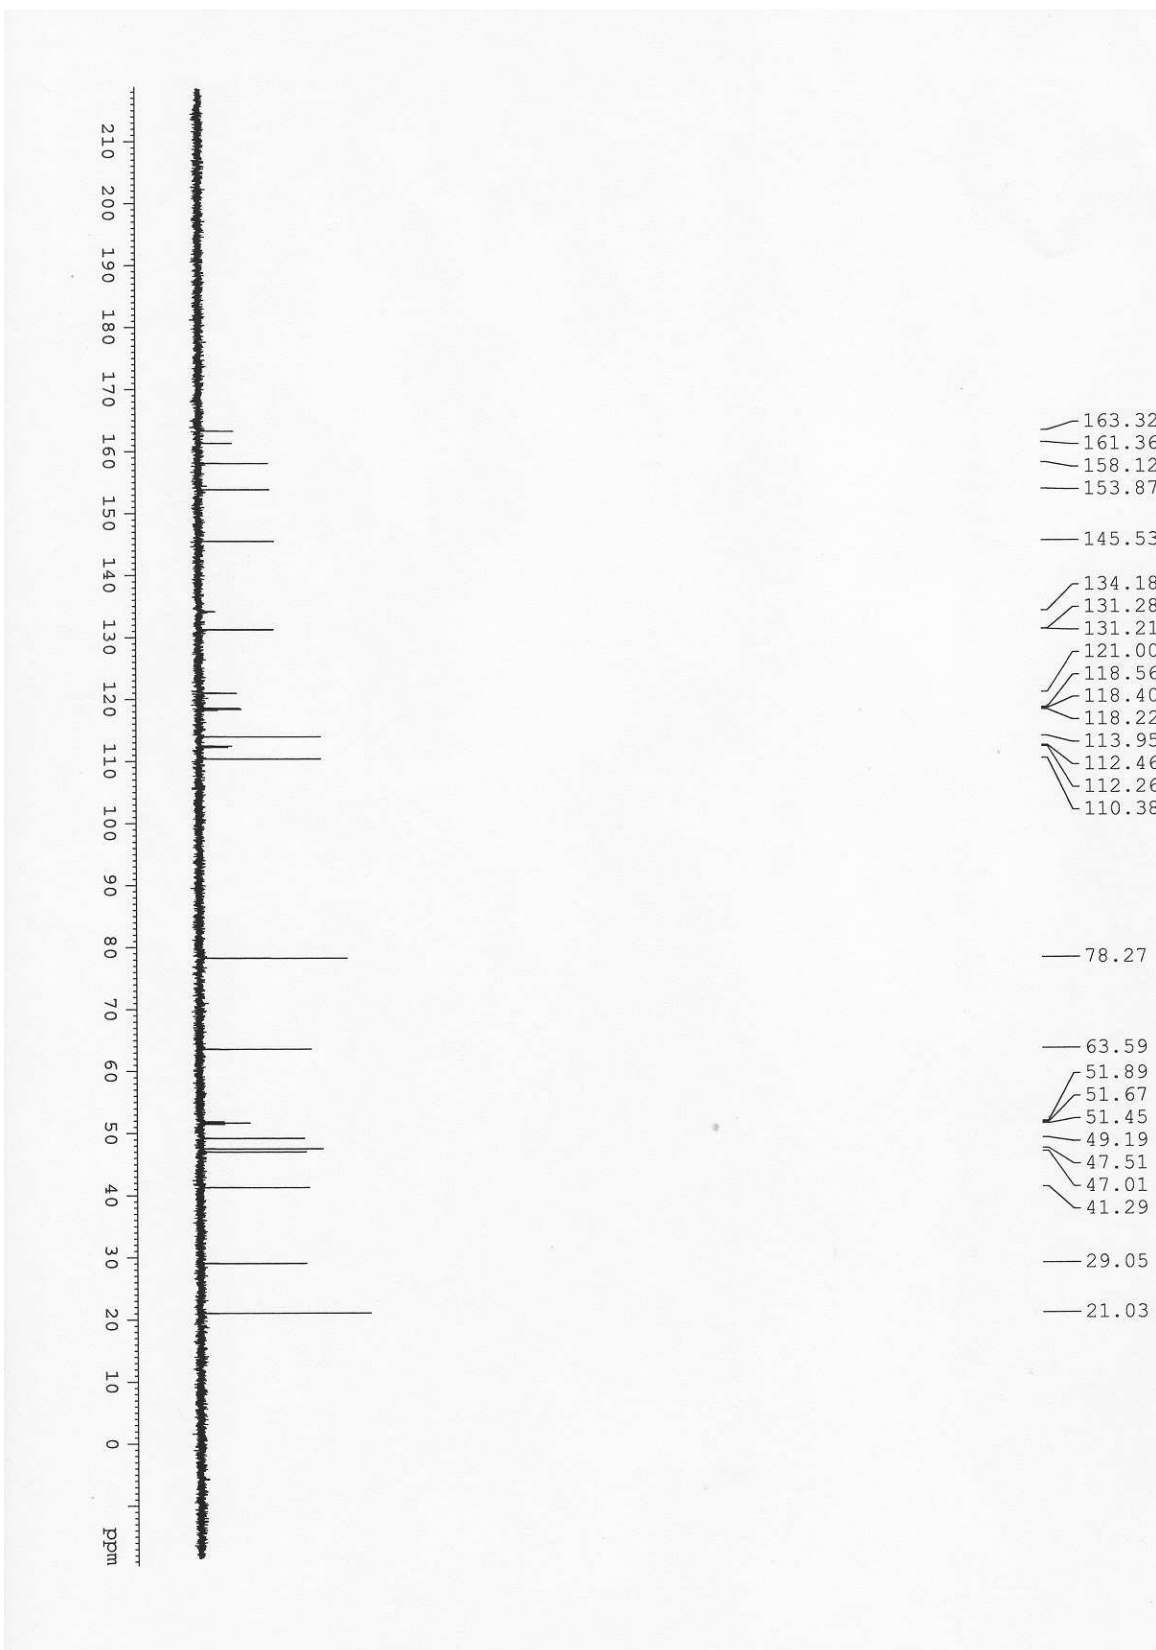

**Figure S12.** <sup>13</sup>C NMR spectrum of **3b**.

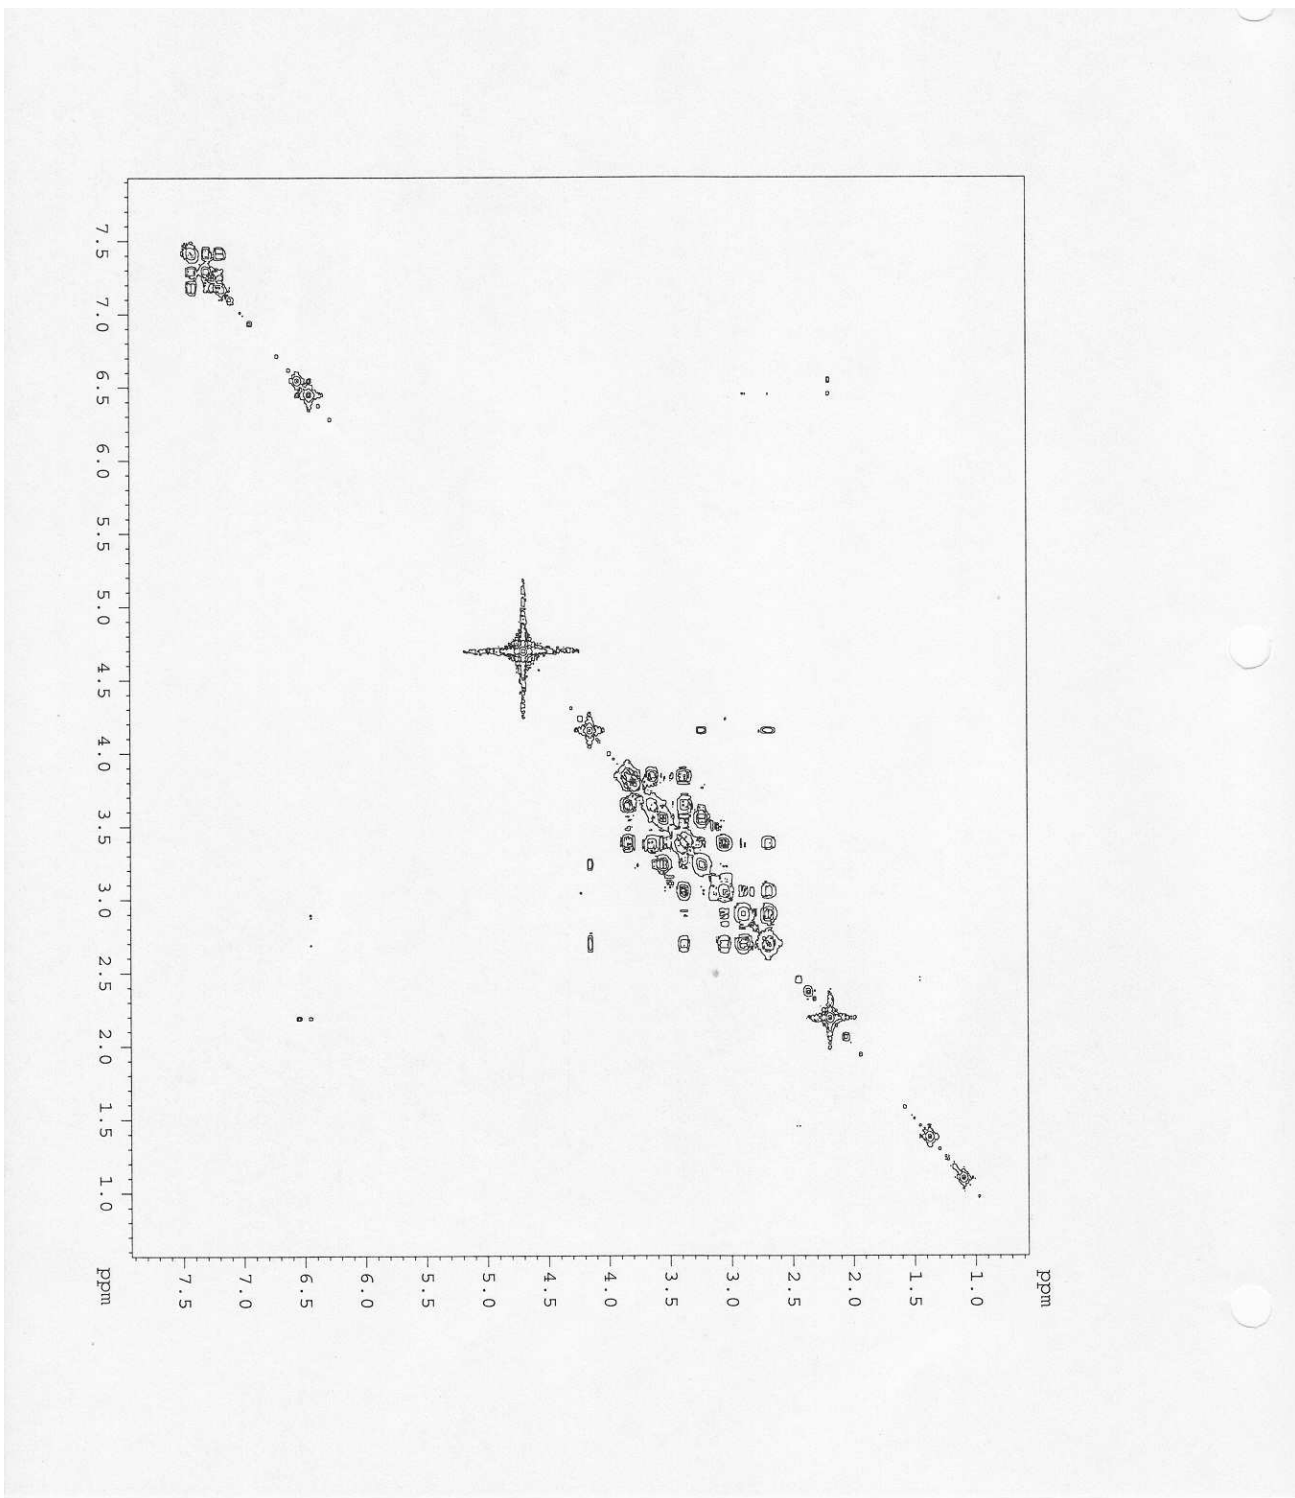

**Figure S13.** COSY NMR spectrum of **3b**.

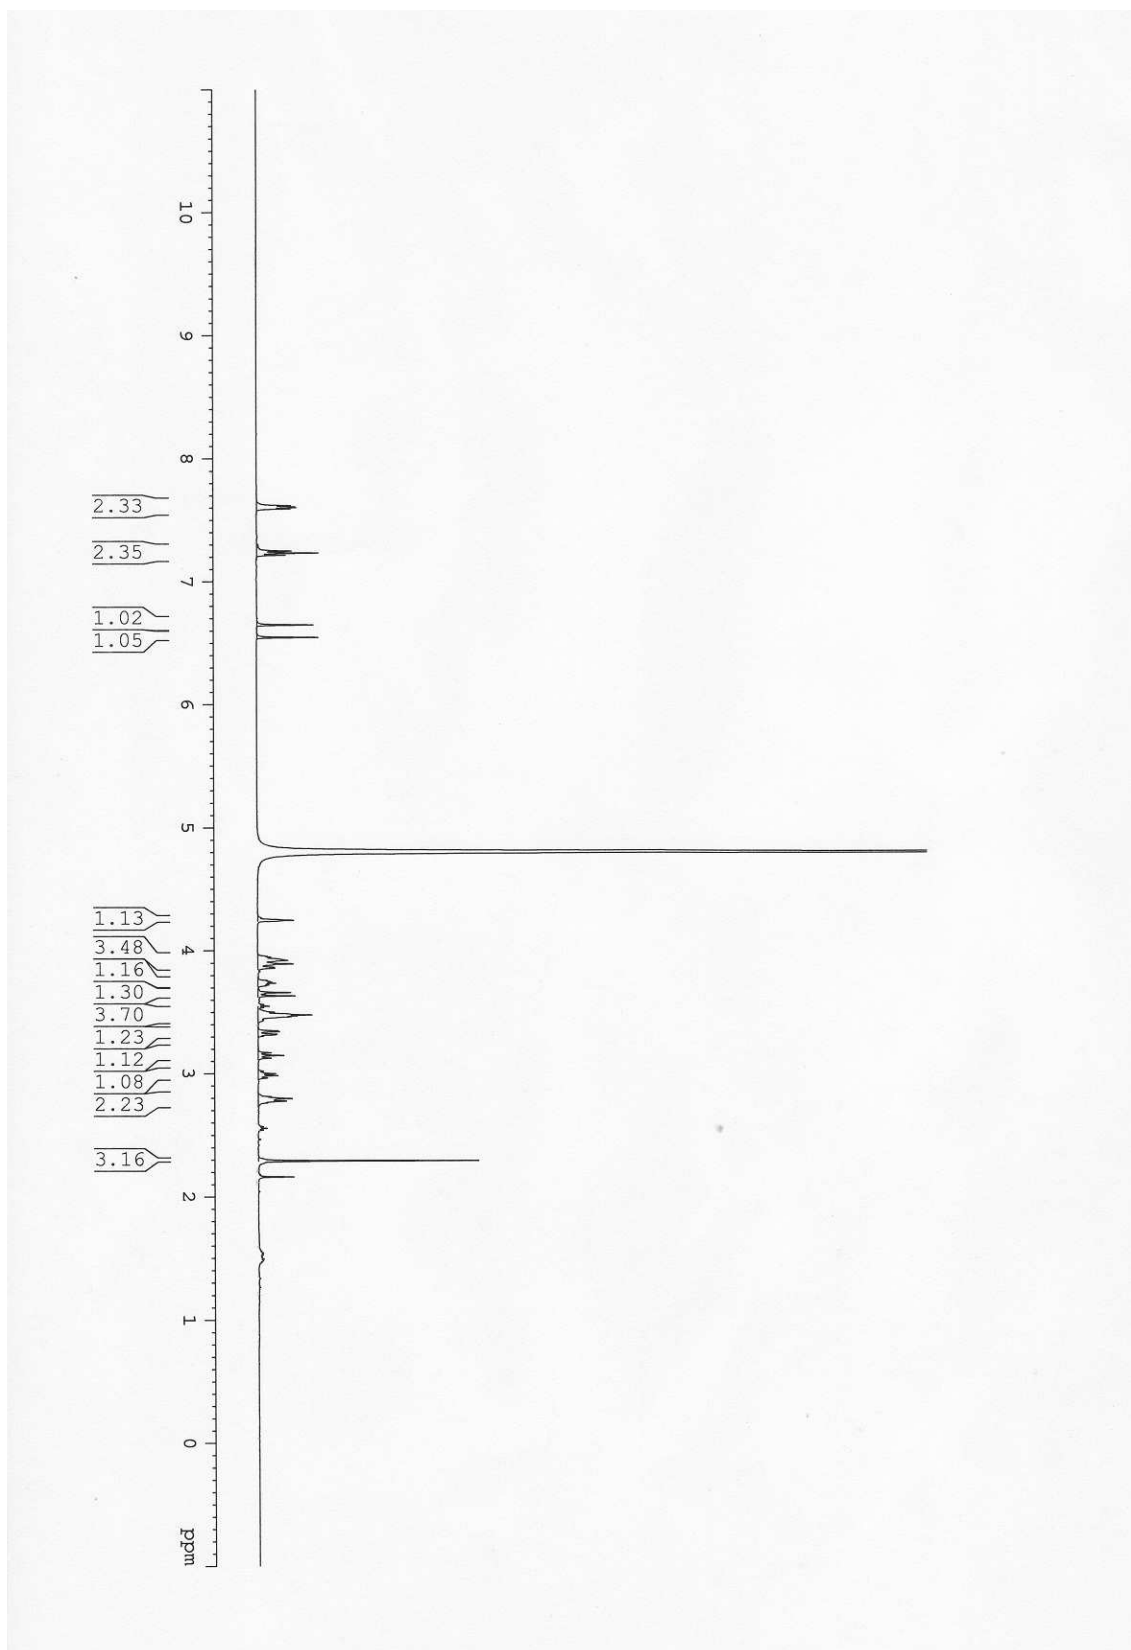

**Figure S14.**  $^1\text{H}$  NMR spectrum of **3c**.

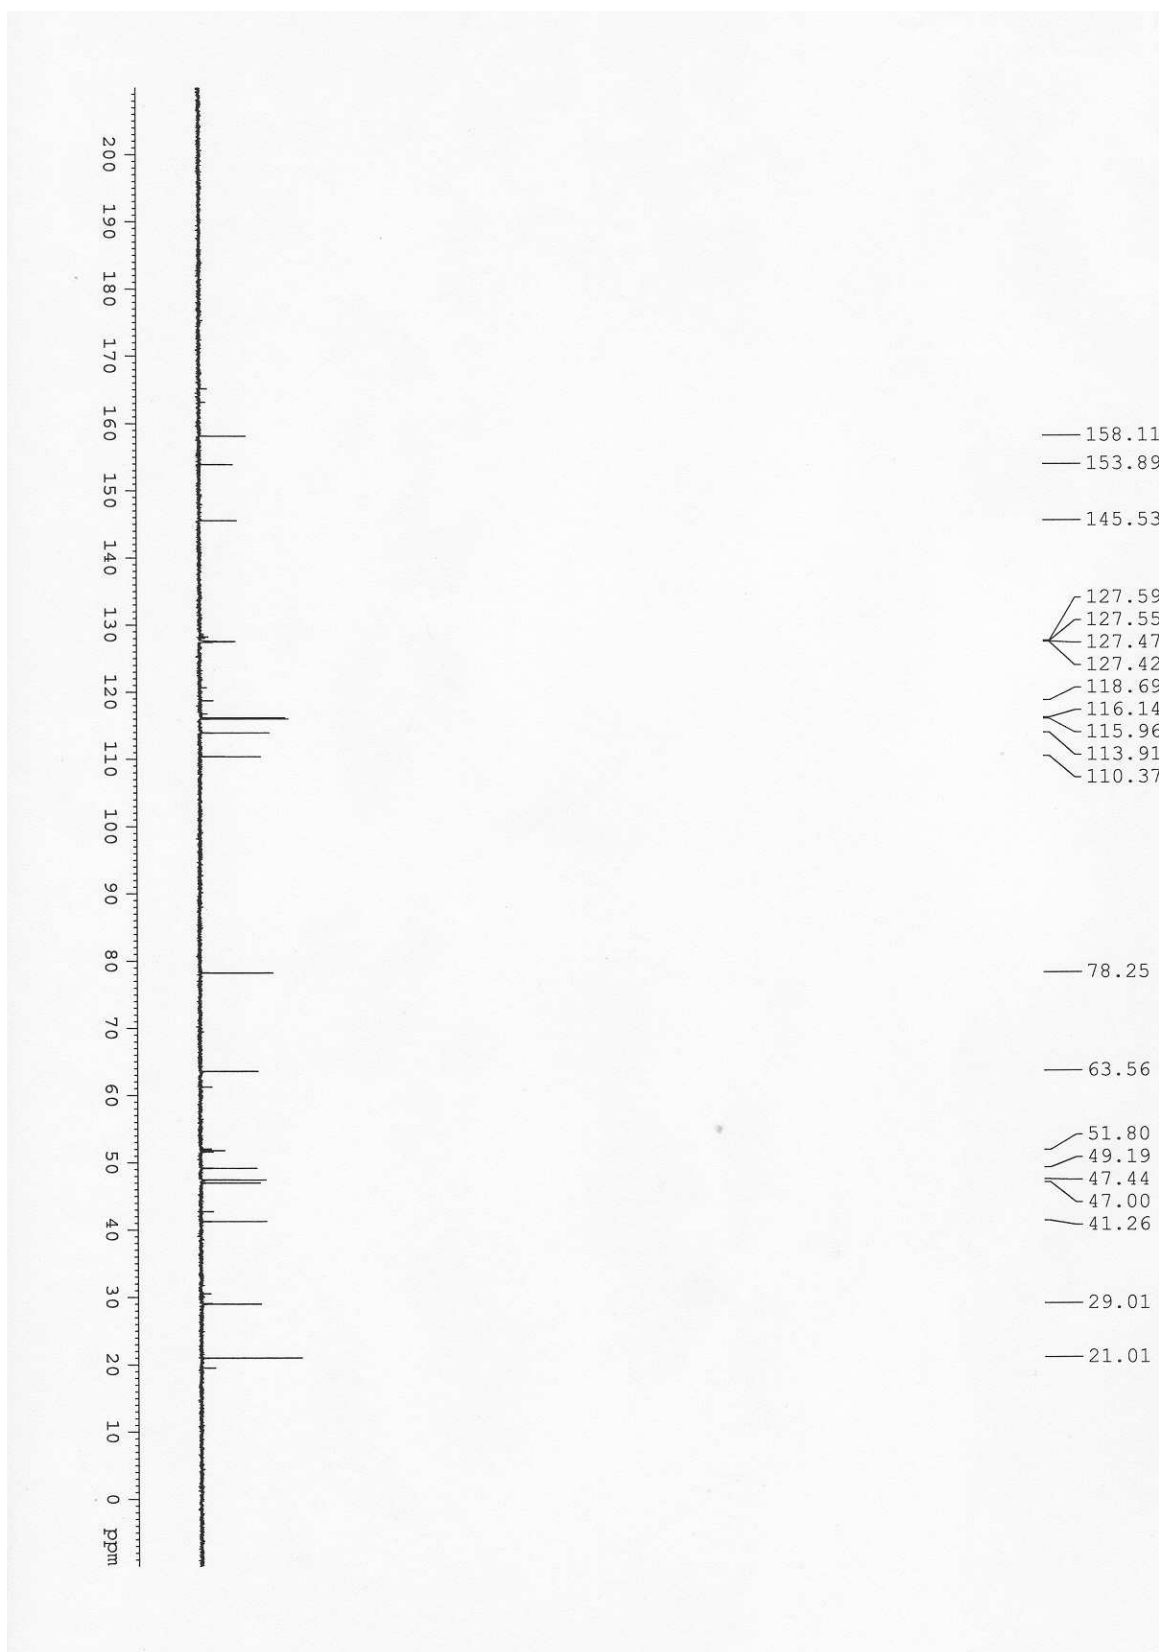

**Figure S15.**  $^{13}\text{C}$  NMR spectrum of **3c**.



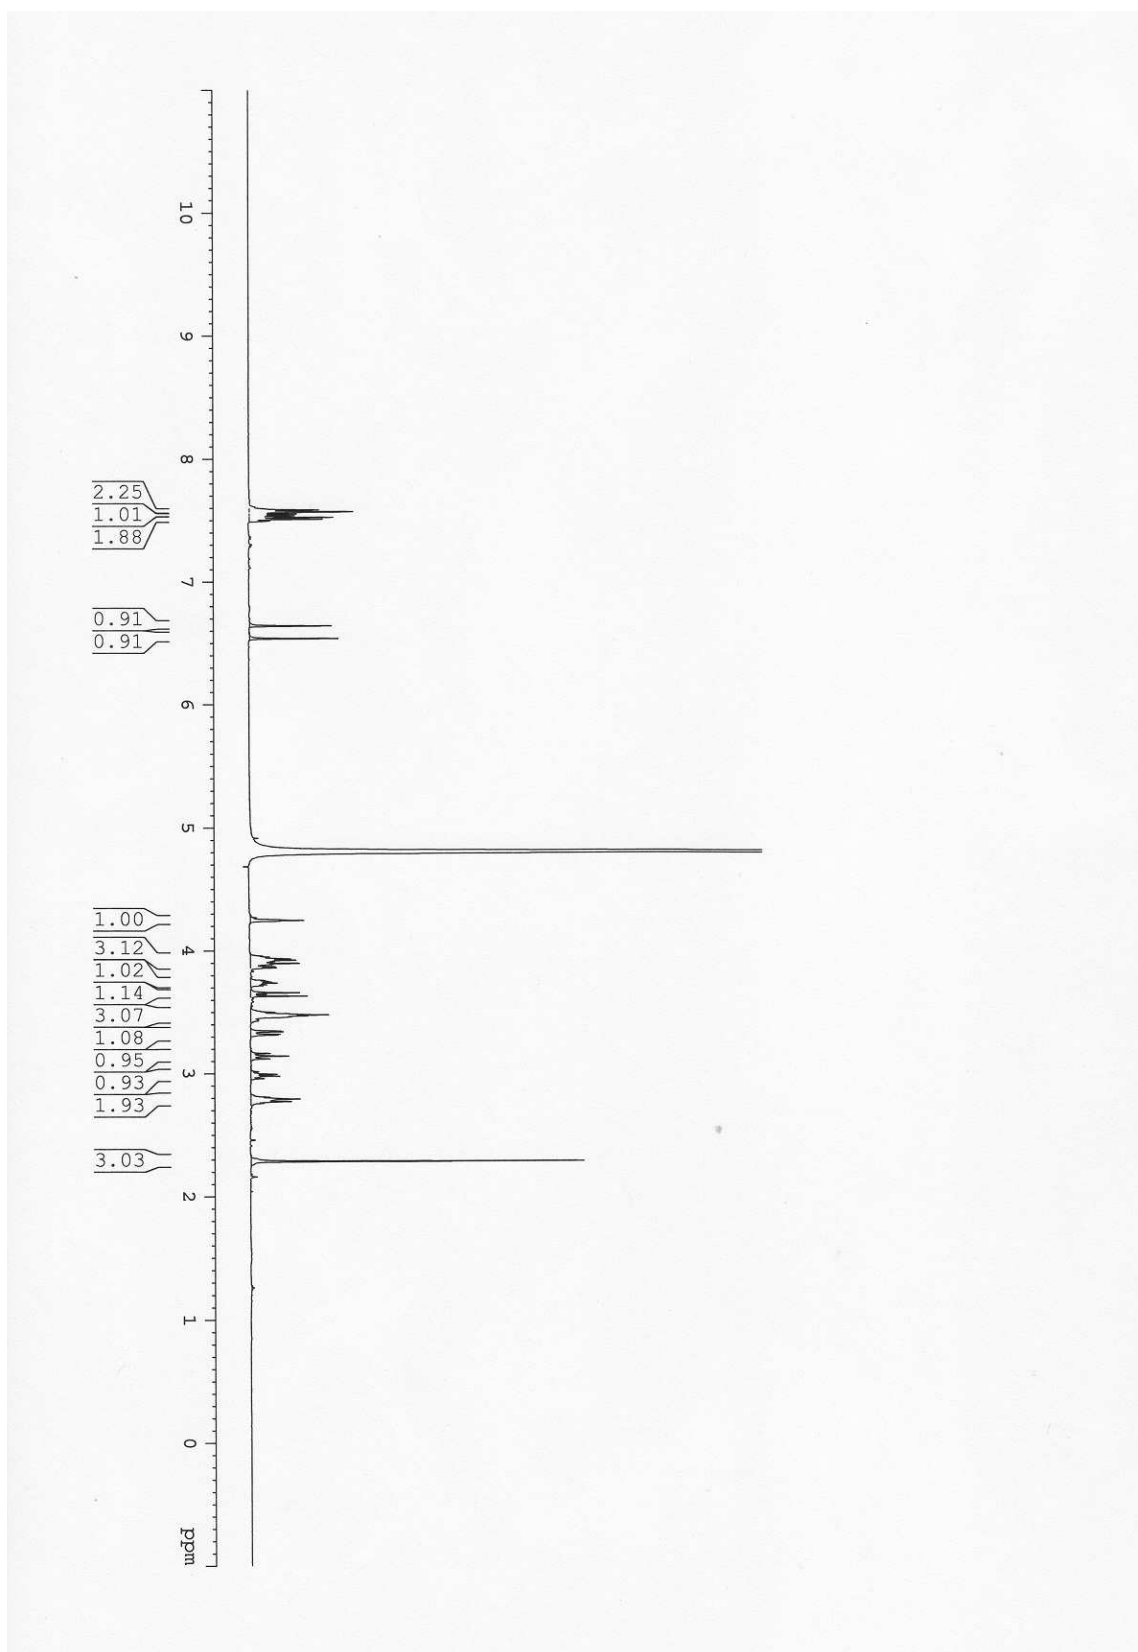

**Figure S16.**  $^1\text{H}$  NMR spectrum of **3d**.

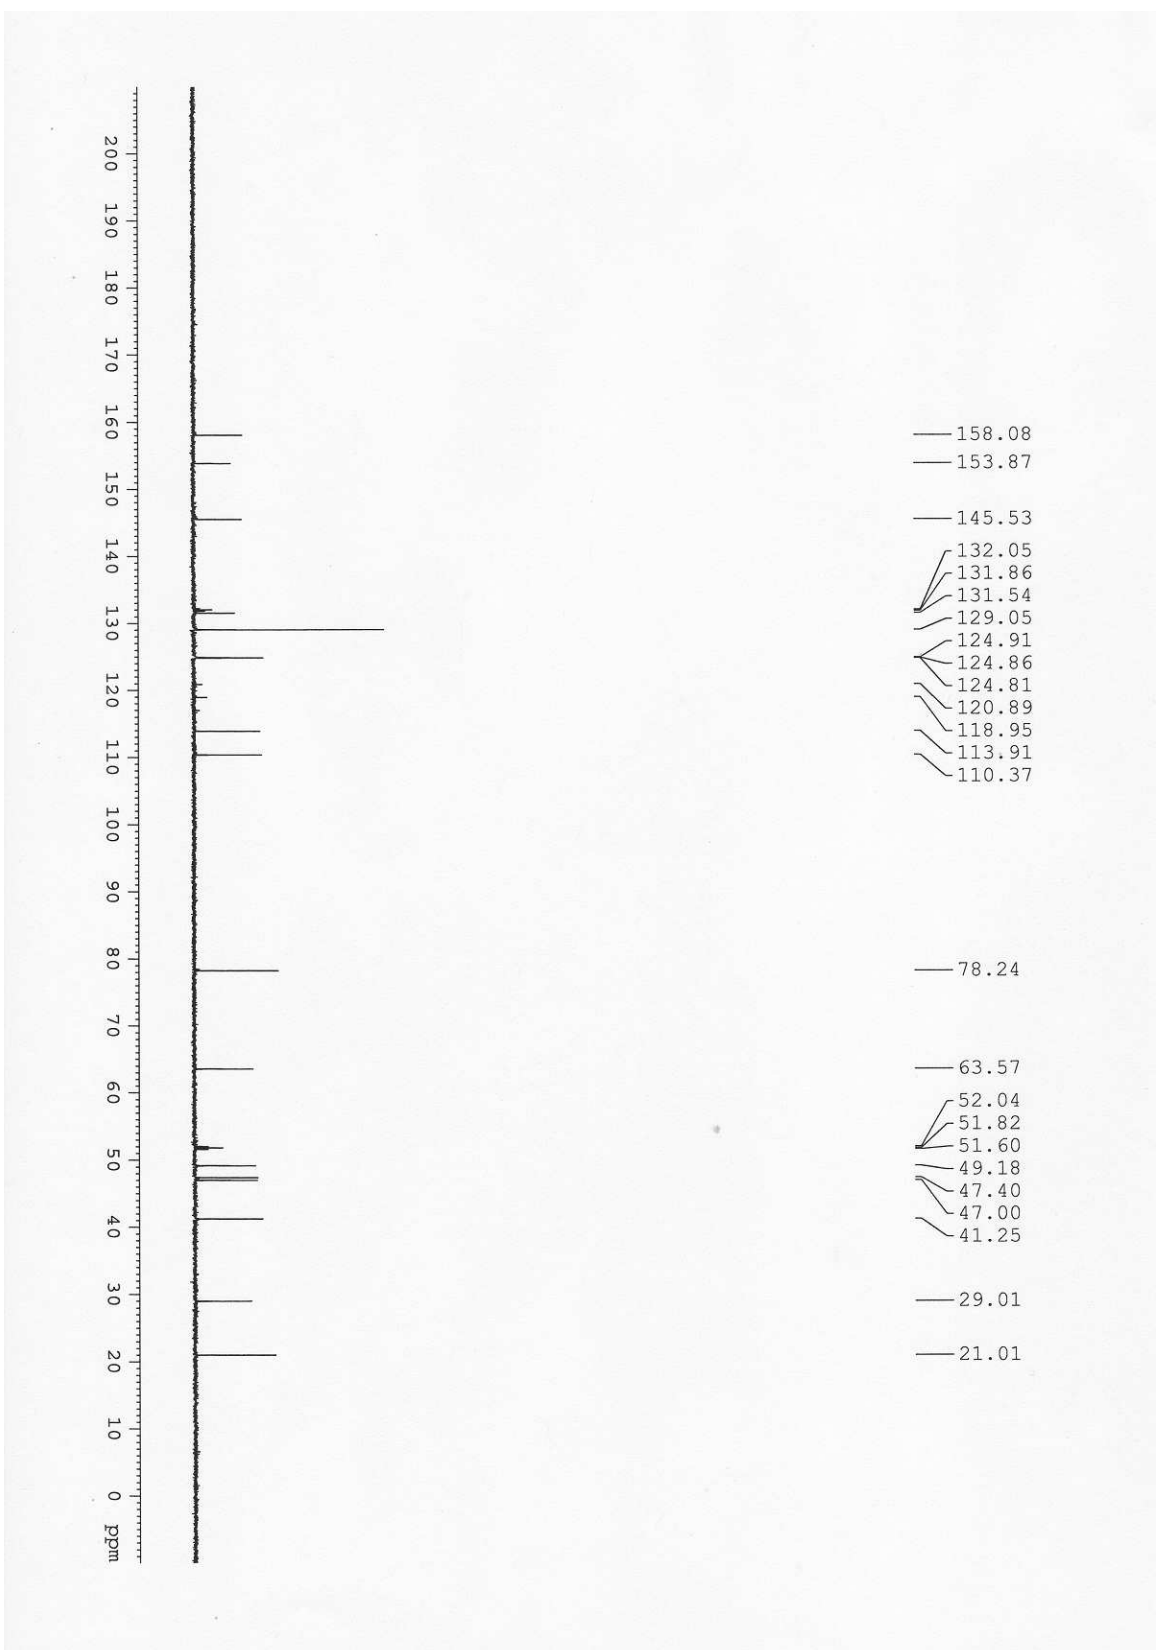

Figure S17.  $^{13}\text{C}$  NMR spectrum of 3d.

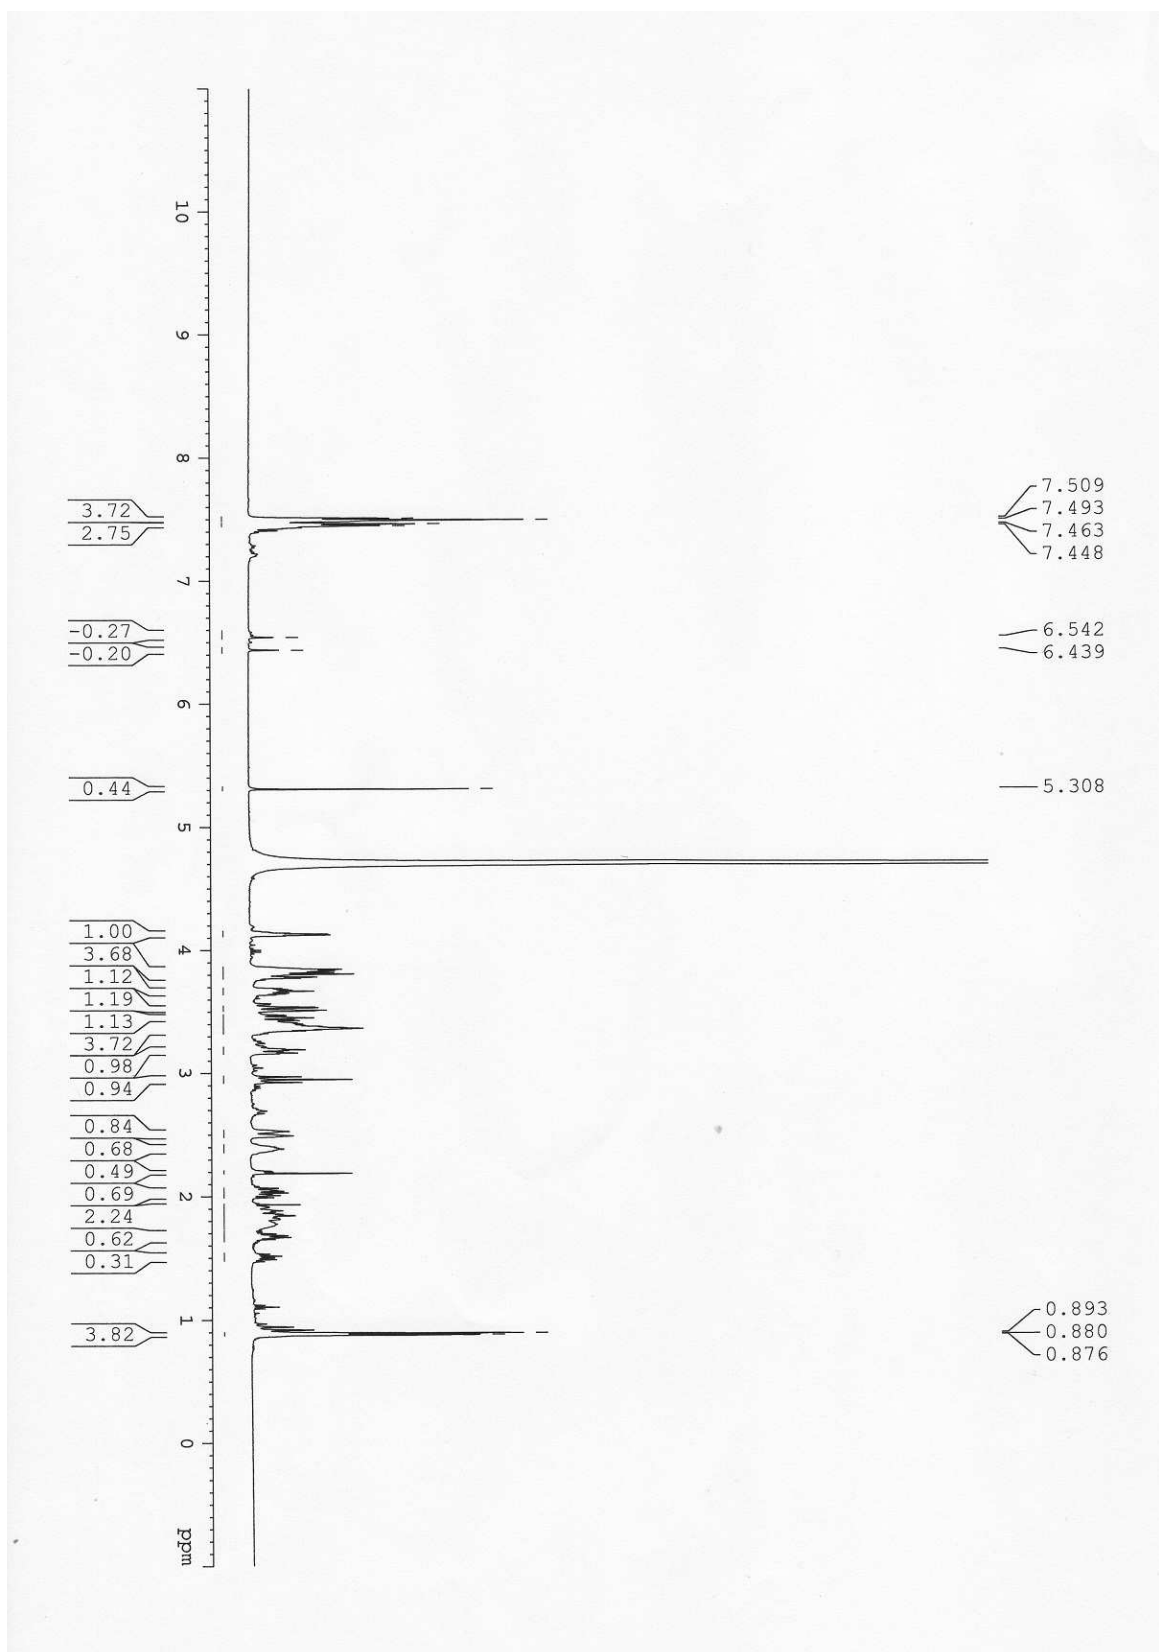

**Figure S18.**  $^1\text{H}$  NMR spectrum of **3e**.

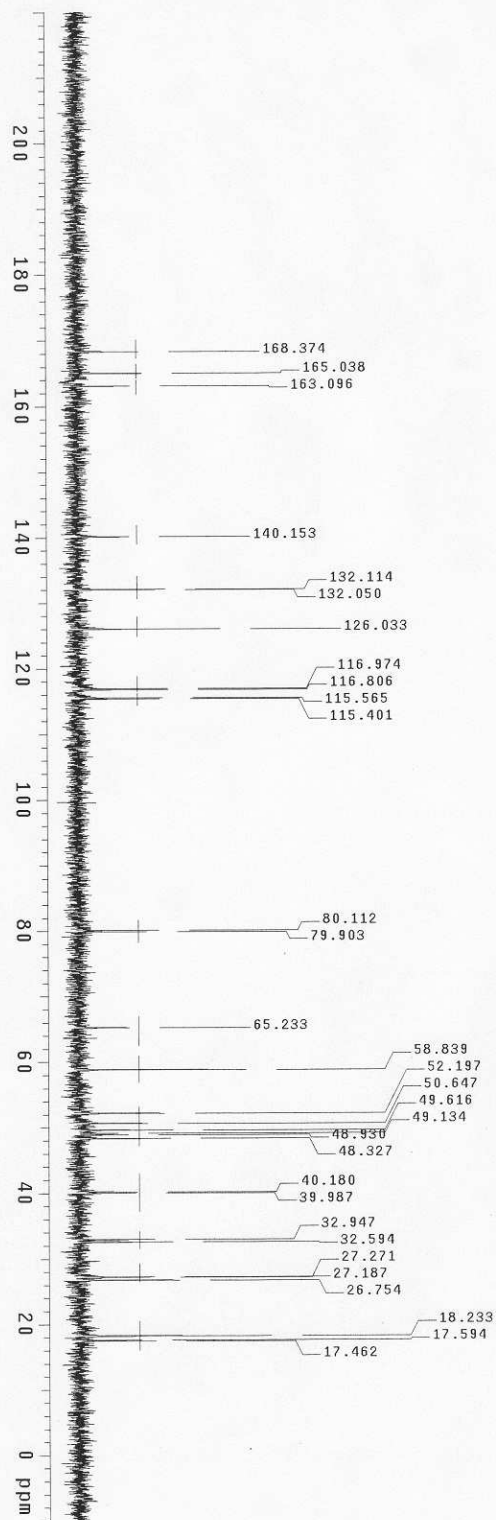

Figure S19.  $^{13}\text{C}$  NMR spectrum of **3e**.

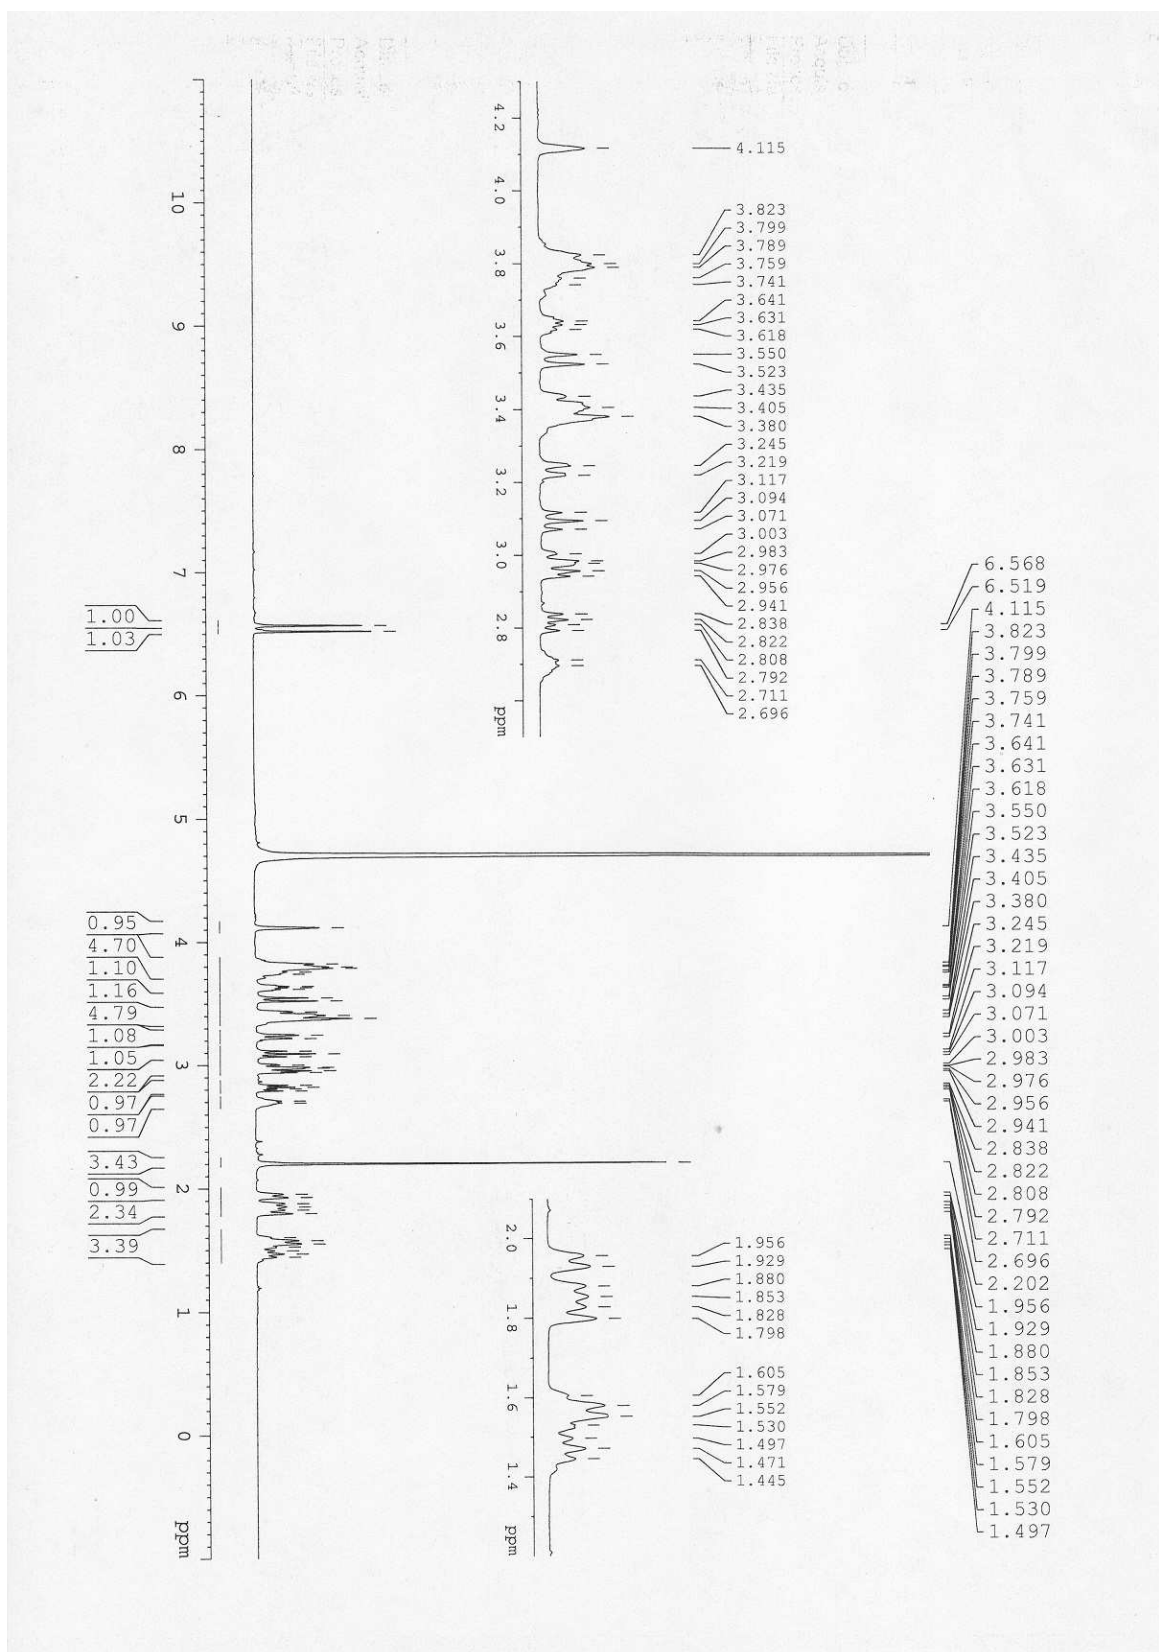

**Figure S20.**  $^1\text{H}$  NMR spectrum of **3f**.

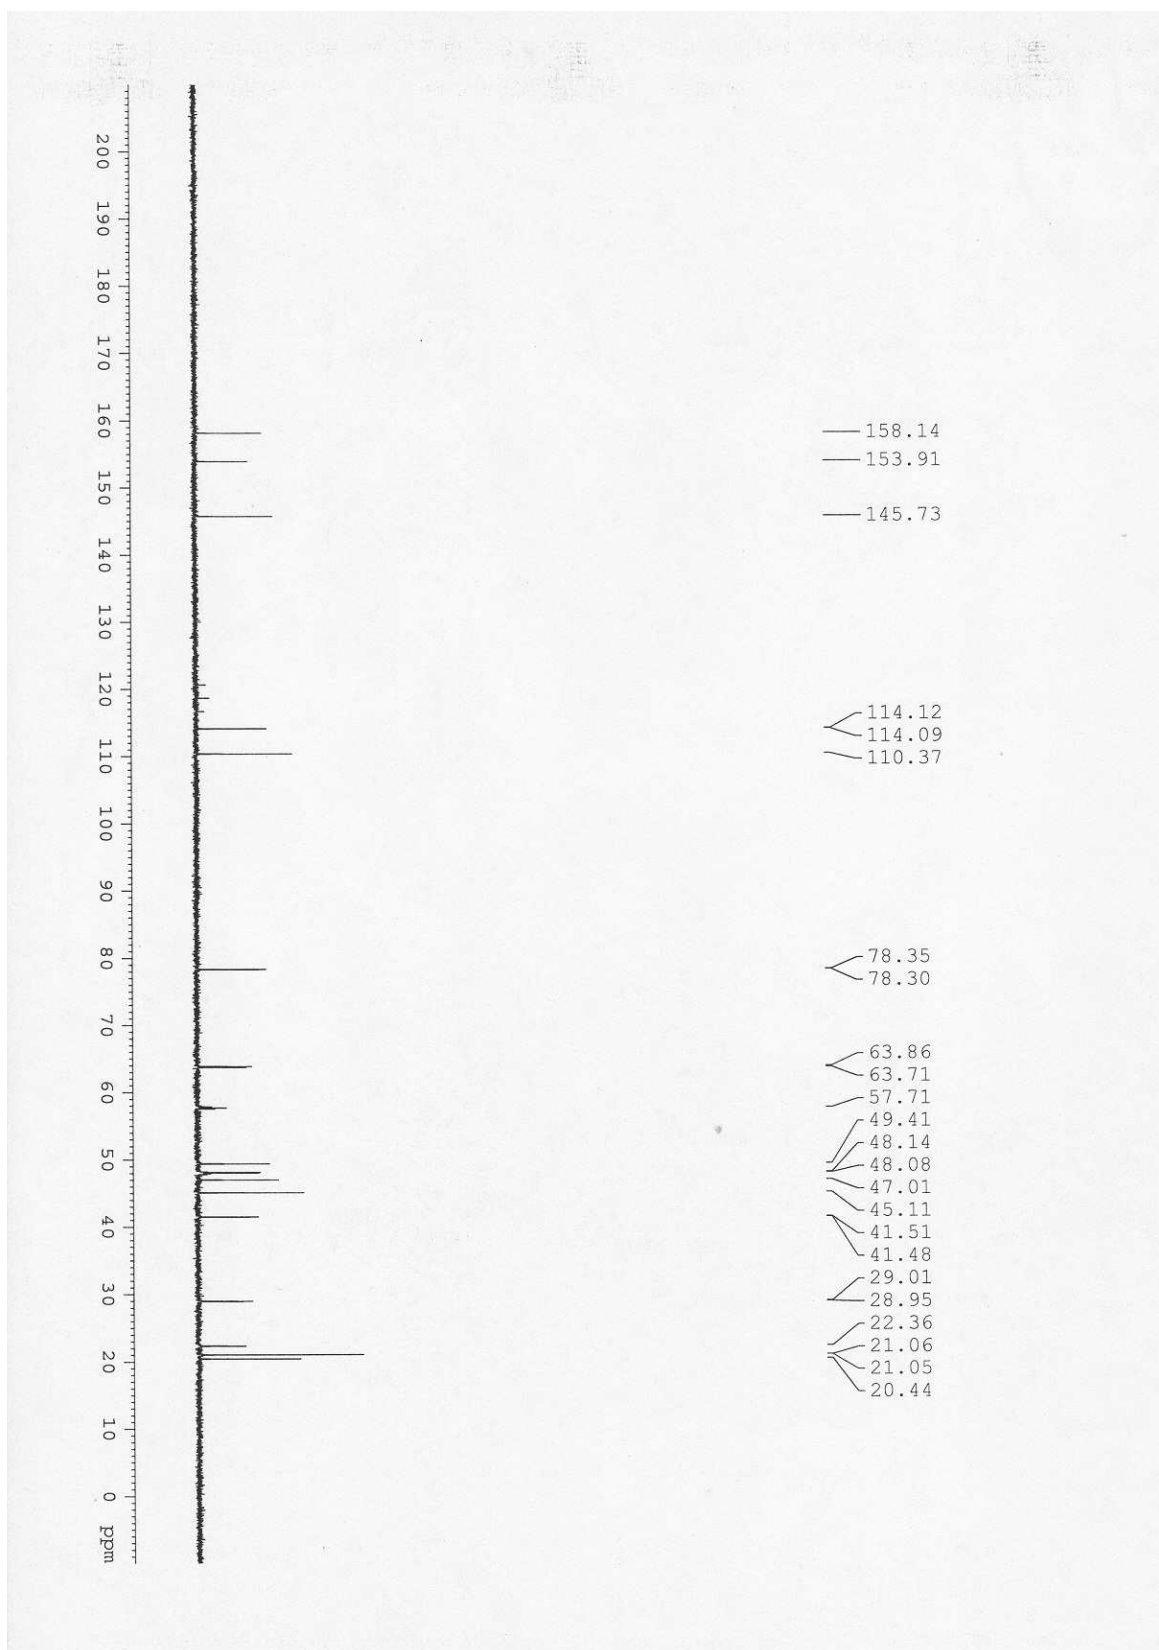

**Figure S21.**  $^{13}\text{C}$  NMR spectrum of **3f**.

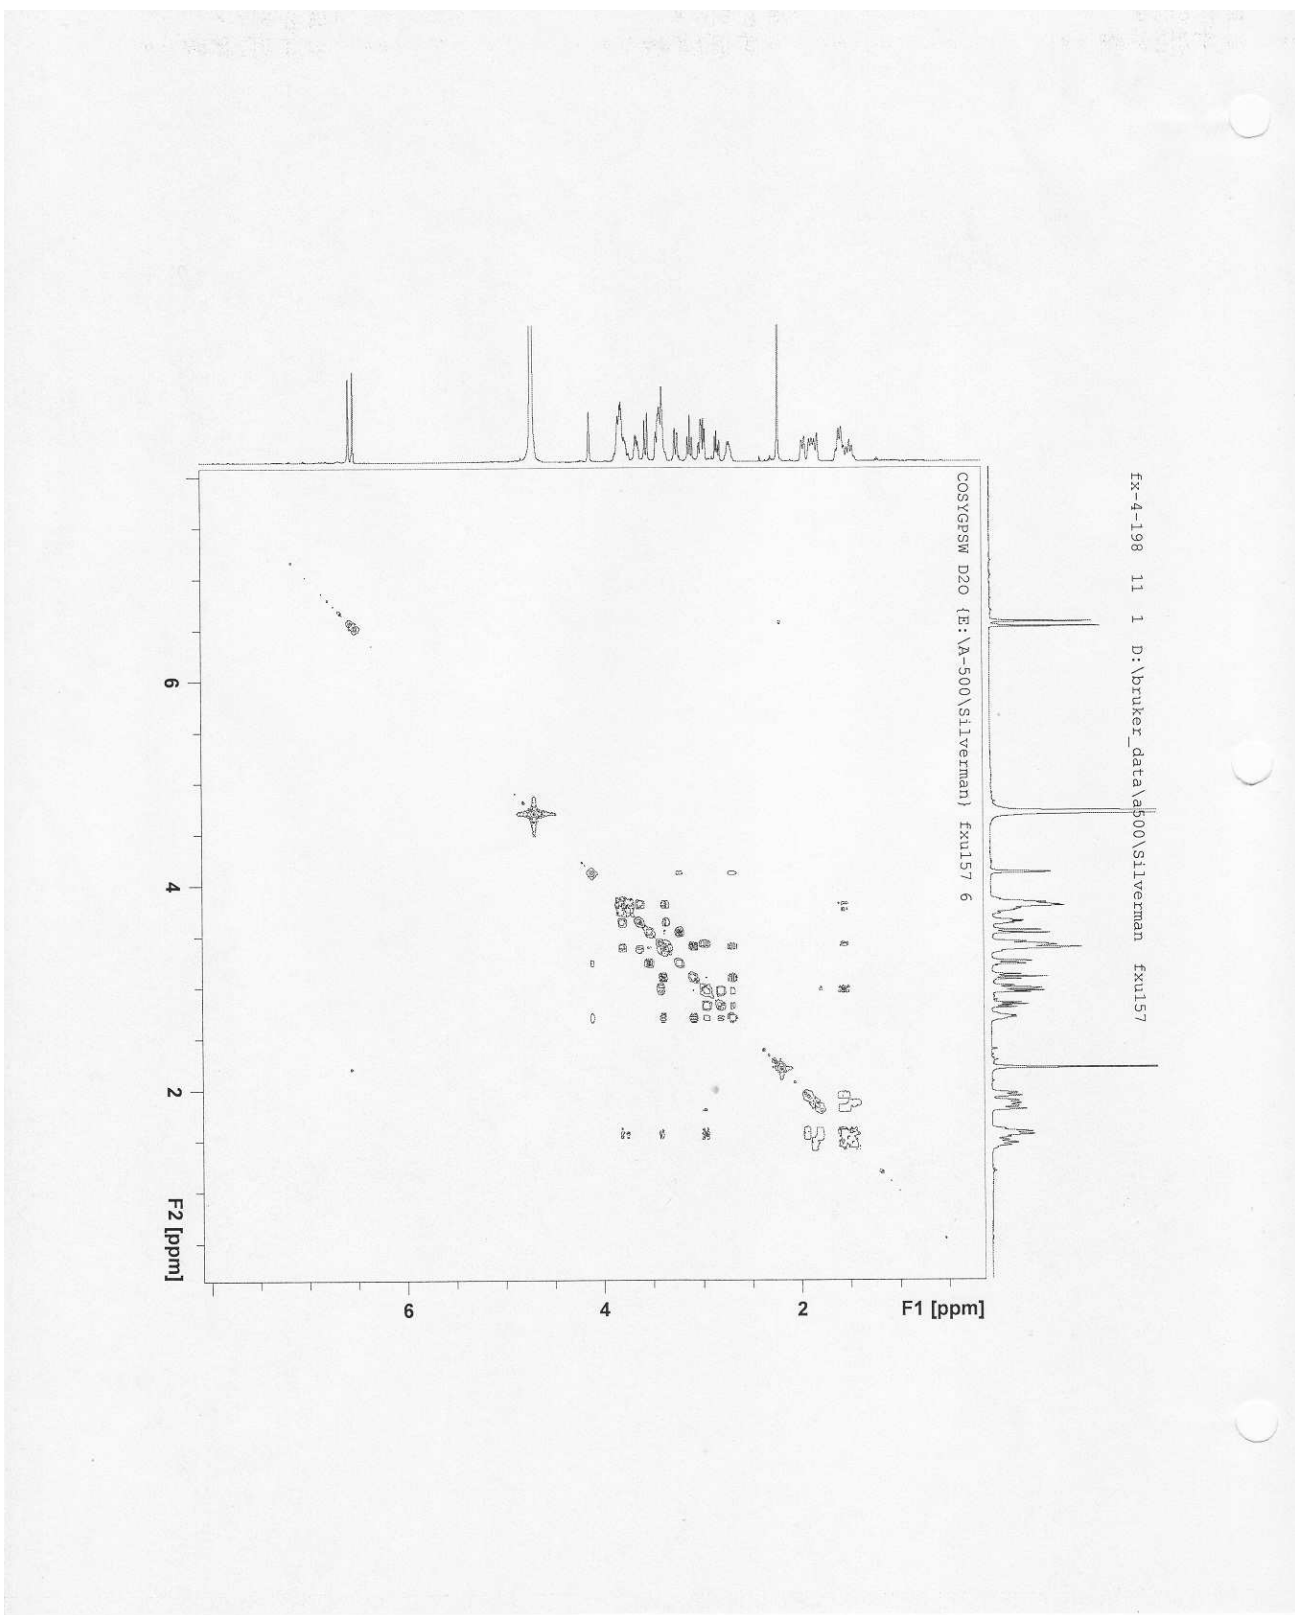

**Figure S22.** COSY NMR spectrum of **3f**.
